# Supplementary material for: Asymmetric esterification of ketenes catalyzed by an N-heterocyclic carbene
Source: Royal Society of Chemistry journal article supplement (doi:10.1039/b815139c), 2008-11-18
Supplement: b815139c.pdf [file b815139c.pdf]

## Electronic Supplementary Information

### Asymmetric Esterification of Ketenes Catalyzed by N-Heterocyclic Carbene

Xiao-Na Wang, Hui Lv, Xue-Liang Huang and Song Ye\*

Beijing National Laboratory for Molecular Sciences, Laboratory of Chemical Biology,

Institute of Chemistry, Chinese Academy of Sciences, Beijing 100190, China

songye@iccas.ac.cn

#### Table of Contents

|                                                                            |    |
|----------------------------------------------------------------------------|----|
| Part I Experimental Part .....                                             | 2  |
| 1.1 General Information .....                                              | 2  |
| 1.2 Screening of alcohols and optimization of reaction conditions .....    | 3  |
| 1.3 References and notes .....                                             | 6  |
| Part II Copies of <sup>1</sup> H NMR and <sup>13</sup> C NMR Spectra ..... | 7  |
| Part III Copies of HPLC spectra .....                                      | 23 |

## Part I Experimental Part

### 1.1 General Information

Unless otherwise indicated, all starting materials were obtained from commercial supplies and used as received. Anhydrous toluene and Et<sub>2</sub>O were distilled from sodium and benzophenone, Chiral triazolium salt **2** was synthesized according to previously report<sup>1</sup>. 2-Phenylethanol was purified by shaking with a solution of ferrous sulfate, and the alcohol layer was washed with distilled water and fractionally distilled. Ketenes were prepared according to literature<sup>2</sup>. All reactions were carried out under an argon atmosphere in oven-dried glassware with magnetic stirring. Column chromatograph was performed with silica gel 200~300 mesh. All <sup>1</sup>H NMR (300 MHz), <sup>13</sup>C NMR (75 MHz) spectra were recorded on a Bruker-DMX 300 spectrometer in CDCl<sub>3</sub>, with tetramethylsilane as an internal standard and reported in parts per million (ppm, δ). <sup>1</sup>H NMR spectroscopy splitting patterns were designated as singlet (s), doublet (d), triplet (t). Splitting patterns that could not be interpreted or easily visualized were designated as multiplet (m) or broad (br). Infrared spectra were recorded on a JASCO FT/IR-480 spectrophotometer and reported as wave number (cm<sup>-1</sup>). Optical rotations were measured on Perkin Elmer/Model-343 digital polarimeter operating at the sodium D line with a 100 mm path cell, and reported as follows: [α]<sub>D</sub><sup>T</sup> (concentration (g/100 mL), solvent).

## 1.2 Screening of alcohols and optimization of reaction conditions

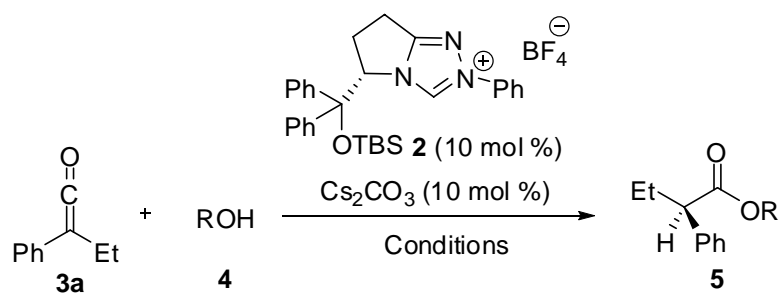

**General Procedure A (Method A).** To the mixture of triazolium salt **2** (10 mol %), Cs<sub>2</sub>CO<sub>3</sub> (10 mol %), and alcohol in toluene (9 mL) was added the solution of ketene in toluene (10 mL). The reaction mixture was stirred under N<sub>2</sub> at the specified temperature for the specified amount of time, and then it was quenched by the addition of silica gel, the mixture was further stirred for ten minutes. The reaction mixture was diluted with diethyl ether, and passed through a short silica pad. The solvent was removed under reduced pressure and the residue was purified by chromatography on silica gel (Et<sub>2</sub>O/petroleum ether, typically 1:90) to give the desired product.

**General Procedure B (Method B).** The same as Method A, except that the solution of ketene was added via a syringe pump over 30 min.

**General Procedure C (Method C).** To the mixture of ketene (0.5 mmol) and benzhydrol (184.3 mg, 1.0 mmol) in toluene (2 mL) at -40°C was added the solution of NHC **2'**, which was freshly prepared from NHC precursor **2** (34.2 mg, 0.06 mmol) and Cs<sub>2</sub>CO<sub>3</sub> (16.3 mg, 0.05 mol) in toluene/ether (1/1, 2 mL) at rt for 1 h. The

reaction mixture was stirred at -40 °C for specified time (See below). After quenched with silica gel and further stirred for 10 min, the reaction mixture was diluted with diethyl ether, and passed through a short silica pad. The solvent was removed under reduced pressure and the residue was purified by chromatography on silica gel to give the desired product.

Racemic samples of esters for the standard of chiral HPLC spectra were prepared using 10 mol % Cs<sub>2</sub>CO<sub>3</sub> as catalyst.

**(R)-methyl 2-phenylbutanoate**<sup>3</sup>

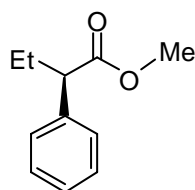

**Table 1, entry 1.** General Procedure A was followed: To the mixture of triazolium salt **2** (57.0 mg, 0.1 mmol), Cs<sub>2</sub>CO<sub>3</sub> (32.6 mg, 0.1 mmol), methanol (40.5 μL, 1.0 mmol) in toluene (9 mL) was added the solution of ketene (1.5 mmol) in toluene (10 mL) in one portion. Reaction temperature: -78 °C. Reaction time: 15 h. Yield: 149.6 mg, 84%; R<sub>f</sub> = 0.24 (Et<sub>2</sub>O/petroleum ether = 1:90); colorless oil. <sup>1</sup>H NMR (300 MHz, CDCl<sub>3</sub>) δ 7.29-7.16 (m, 5H), 3.57 (s, 3H), 3.44 (t, *J* = 7.7 Hz, 1H), 2.16-2.01 (m, 1H), 1.85-1.70 (m, 1H), 0.86 (t, *J* = 7.4 Hz, 3H); <sup>13</sup>C NMR (75 MHz, CDCl<sub>3</sub>) δ 174.5, 139.1, 128.5, 127.9, 127.1, 53.3, 51.8, 26.7, 12.1; HPLC analysis: 13% ee [Daicel CHIRALPAK OD-H column; 20 °C; 0.5 mL/min; solvent system: 2-propanol/hexane = 0.5:99.5; retention times: 9.6 min (major), 10.4 min (minor)].

### (*R*)-phenethyl 2-phenylbutanoate

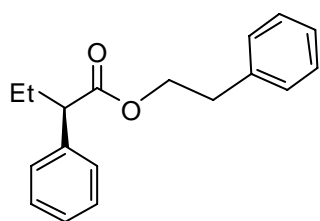

**Table 1, entry 2.** General Procedure A was followed: To the mixture of triazolium salt **2** (57.0 mg, 0.1 mmol), Cs<sub>2</sub>CO<sub>3</sub> (32.6 mg, 0.1 mmol), 2-Phenylethanol (119.8 μL, 1.0 mmol) in toluene (9 mL) was added the solution of ketene (1.5 mmol) in toluene (10 mL) in one portion. Reaction temperature: -78 °C. Reaction time: 20 h. Yield: 284.0 mg, 99%; R<sub>f</sub> = 0.34 (Et<sub>2</sub>O/petroleum ether = 1:80); colorless oil. <sup>1</sup>H NMR (300 MHz, CDCl<sub>3</sub>) δ 7.24-7.13 (m, 8H), 7.04-7.02 (m, 2H), 4.23 (t, *J* = 6.8 Hz, 2H), 3.40 (t, *J* = 7.6 Hz, 1H), 2.80 (t, *J* = 6.8 Hz, 2H), 2.10-1.98 (m, 1H), 1.79-1.69 (m, 1H), 0.82 (t, *J* = 7.3 Hz, 3H); <sup>13</sup>C NMR (75 MHz, CDCl<sub>3</sub>) δ 173.5, 138.9, 137.6, 128.6, 128.3, 128.2, 127.8, 126.9, 126.2, 64.8, 53.39, 34.7, 26.4, 11.9; IR (KBr) ν 3029, 2964, 2934, 1732, 1496, 1455, 1263, 1199, 1163, 799, 748, 698 cm<sup>-1</sup>; MS (EI): *m/z* 268 (M<sup>+</sup>, 1.2), 119 (PhCH<sup>+</sup>C<sub>2</sub>H<sub>5</sub>, 9.6), 105 (PhCH<sub>2</sub>CH<sub>2</sub><sup>+</sup>, 15.5), 104 (PhCH=CH<sup>+</sup>, 100), 91 (PhCH<sub>2</sub><sup>+</sup>, 26.9); HRMS (EI) calcd for C<sub>18</sub>H<sub>20</sub>O<sub>2</sub> [M]<sup>+</sup> 268.1463, found 268.1465; HPLC analysis: 11% ee [Daicel CHIRALPAK OD-H column; 20 °C; 0.7 mL/min; solvent system: 2-propanol/hexane = 0.4:99.6; retention times: 21.6 min (major), 28.1 min (minor)].

### (*R*)-benzyl 2-phenylbutanoate<sup>4</sup>

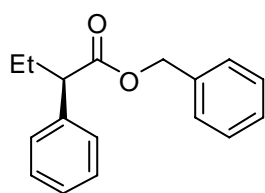

**Table 1, entry 3.** General Procedure A was followed: To the mixture of triazolium salt **2** (57.0 mg, 0.1 mmol), Cs<sub>2</sub>CO<sub>3</sub> (32.6 mg, 0.1 mmol), benzyl alcohol (109.3 μL, 1.0 mmol) in toluene (9 mL) was added the solution of ketene (1.5 mmol) in toluene (10 mL) in one portion.

Reaction temperature: -78 °C. Reaction time: 21 h. Yield: 166.5 mg, 65%;  $R_f = 0.33$  (Et<sub>2</sub>O/petroleum ether = 1:80); colorless oil. <sup>1</sup>H NMR (300 MHz, CDCl<sub>3</sub>) δ 7.26-7.15 (m, 10H), 5.07 (d,  $J = 12.5$  Hz, 1H), 4.99 (d,  $J = 12.5$  Hz, 1H), 3.44 (t,  $J = 7.7$  Hz, 1H), 2.10-2.00 (m, 1H), 1.80-1.70 (m, 1H), 0.81 (t,  $J = 7.4$  Hz, 3H); <sup>13</sup>C NMR (75 MHz, CDCl<sub>3</sub>) δ 173.8, 138.9, 136.0, 128.5, 128.4, 128.0, 128.0, 127.8, 127.1, 66.3, 53.4, 26.6, 12.1; HPLC analysis: 36% ee [Daicel CHIRALPAK OD-H column; 20 °C; 0.5 mL/min; solvent system: 2-propanol/hexane = 0.4:99.6; retention times: 11.2 min (major), 12.4 min (minor)].

### 1.3 References and notes

- (1) Y.-R. Zhang, L. He, X. Wu, P.-L. Shao, Ye, S. *Org. Lett.* **2008**, *10*, 277-280.
- (2) (a) L. M. Baigrie, H. R. Seiklay, T. T. Tidwell, *J. Am. Chem. Soc.* **1985**, *107*, 5391-5396. (b) A. D. Allen, L. M. Baigrie, L. Gong, T. T. Tidwell, *Can. J. Chem.* **1991**, *69*, 138-145.
- (3) B. L. Hodous, J. C. Ruble, G. C. Fu, *J. Am. Chem. Soc.* **1999**, *121*, 2637-2638.
- (4) J. C. Ruble, G. C. Fu, *J. Org. Chem.* **1996**, *61*, 7230-723.

# Part II Copies of <sup>1</sup>H NMR and <sup>13</sup>C NMR Spectra

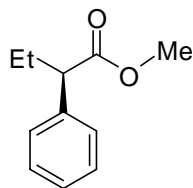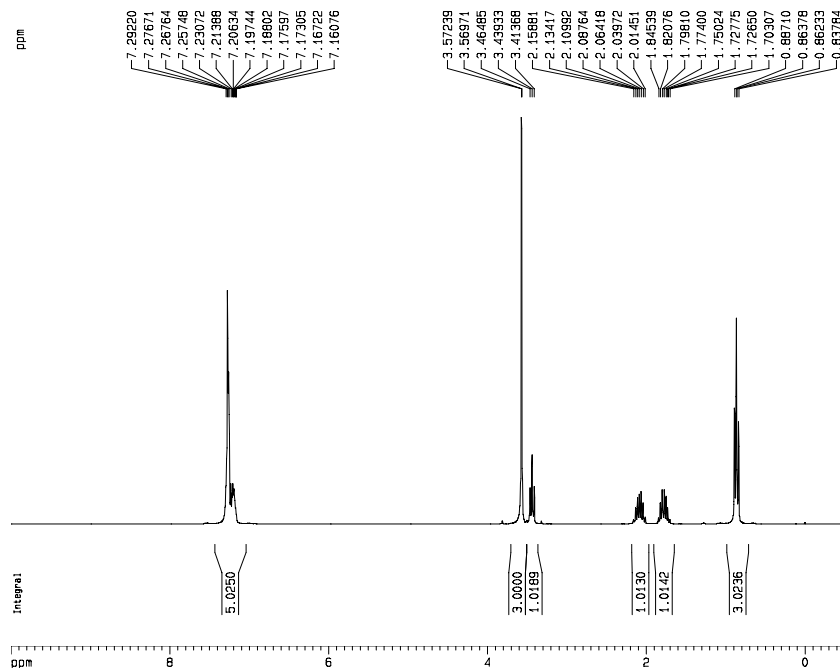

Current Data Parameters  
 NAME wxn12-14-2  
 EXPNO 1  
 PROCNO 1

F2 - Acquisition Parameters  
 Date\_ 20071214  
 Time 21.08  
 INSTRUM av300  
 PROBHD 5 mm DUL 13C-1  
 PULPROG zgpg30  
 ID 65936  
 SOLVENT CDCl3  
 VS 7  
 V5 0  
 SWH 8892.806 Hz  
 FIDRES 0.137219 Hz  
 AQ 3.6438515 sec  
 RG 18  
 JW 55.600 usec  
 DE 6.00 usec  
 TE 296.3 K  
 SI 5.0000000 sec

\*\*\*\*\* CHANNEL f1 \*\*\*\*\*  
 NUC1 1H  
 P1 10.50 usec  
 PL1 -1.00 dB  
 SFO1 300.1318034 MHz

F2 - Processing parameters  
 SI 32768  
 SF 300.1300232 MHz  
 WDW EM  
 SSB 0  
 .B 0.35 Hz  
 .S 0  
 .C 1.00

1D NMR plot parameters  
 CX 20.00 cm  
 CY 10.00 cm  
 F1P 10.000 ppm  
 F1 3001.30 Hz  
 F2P -0.500 ppm  
 F2 -150.07 Hz  
 GAMMA 0.52500 ppm/cm  
 GZCM 157.56827 Hz/cm

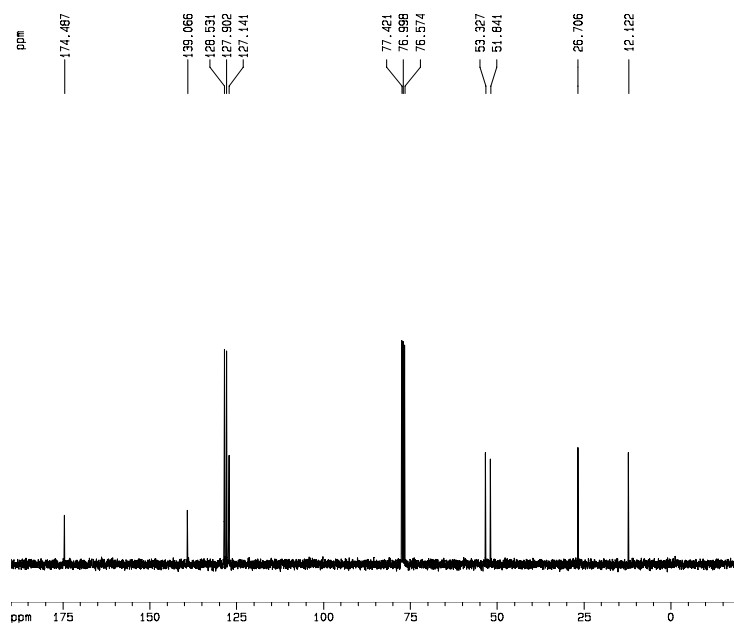

Current Data Parameters  
 NAME wxn12-14-1  
 EXPNO 2  
 PROCNO 1

F2 - Acquisition Parameters  
 Date\_ 20071214  
 Time 20.57  
 INSTRUM av300  
 PROBHD 5 mm DUL 13C-1  
 PULPROG zgpg30  
 ID 65936  
 SOLVENT CDCl3  
 VS 4  
 SWH 17985.511 Hz  
 FIDRES 0.274438 Hz  
 AQ 1.8219928 sec  
 RG 812.7  
 JW 27.800 usec  
 DE 6.00 usec  
 TE 298.4 K  
 SI 2.0000000 sec  
 SI1 0.1300000 sec  
 SI2 0.0000200 sec

\*\*\*\*\* CHANNEL f1 \*\*\*\*\*  
 NUC1 13C  
 P1 12.20 usec  
 PL1 -0.32 dB  
 SFO1 75.4782983 MHz

\*\*\*\*\* CHANNEL f2 \*\*\*\*\*  
 PPRPG2 waitz16  
 NUC2 1H  
 P2P2 80.00 usec  
 PL2 -1.00 dB  
 PL2 16.66 dB  
 PL3 16.00 dB  
 SFO2 300.1312005 MHz

F2 - Processing parameters  
 SI 32768  
 SF 75.4677526 MHz  
 WDW EM  
 SSB 0  
 .B 1.00 Hz  
 .S 0  
 .C 1.40

1D NMR plot parameters  
 CX 20.00 cm  
 CY 6.00 cm  
 F1P 130.000 ppm  
 F1 14438.87 Hz  
 F2P -50.000 ppm  
 F2 -3773.28 Hz  
 GAMMA 12.00000 ppm/cm  
 GZCM 905.61288 Hz/cm

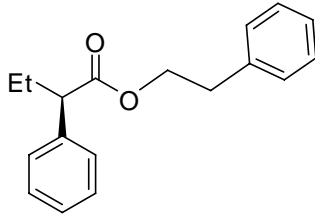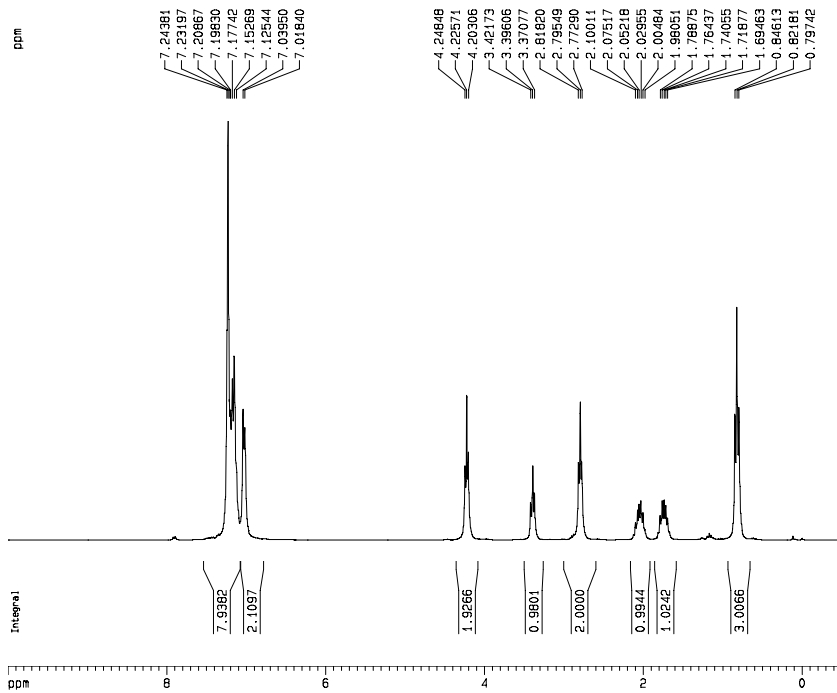

Current Data Parameters  
 NAME wxn27-1  
 EXPNO 1  
 PROCNO 1

F2 - Acquisition Parameters  
 Date\_ 20080103  
 Time 23.46  
 INSTRUM av300  
 PROBHD 5 mm DUL 13C-1  
 PULPROG zg30  
 ID 65536  
 SOLVENT CDCl3  
 NS 13  
 DS 0  
 SWH 8592.806 Hz  
 FIDRES 0.137219 Hz  
 AQ 3.6436816 sec  
 AS 20.2  
 JW 55.600 usec  
 DE 6.00 usec  
 TE 294.7 K  
 D1 5.0000000 sec

===== CHANNEL f1 =====  
 NUC1 1H  
 P1 10.10 usec  
 PL1 -1.00 dB  
 SFO1 300.1318534 MHz

F2 - Processing parameters  
 SI 32768  
 SF 300.1300693 MHz  
 KDN EM  
 SSB 0  
 LB 0.35 Hz  
 GB 0  
 PC 1.00

1D NMR plot parameters  
 CX 20.00 cm  
 CY 10.00 cm  
 F1 3001.30 Hz  
 F2 -0.500 ppm  
 F3 -150.07 Hz  
 PPMCM 0.82500 ppm/cm  
 IZCM 157.56828 Hz/cm

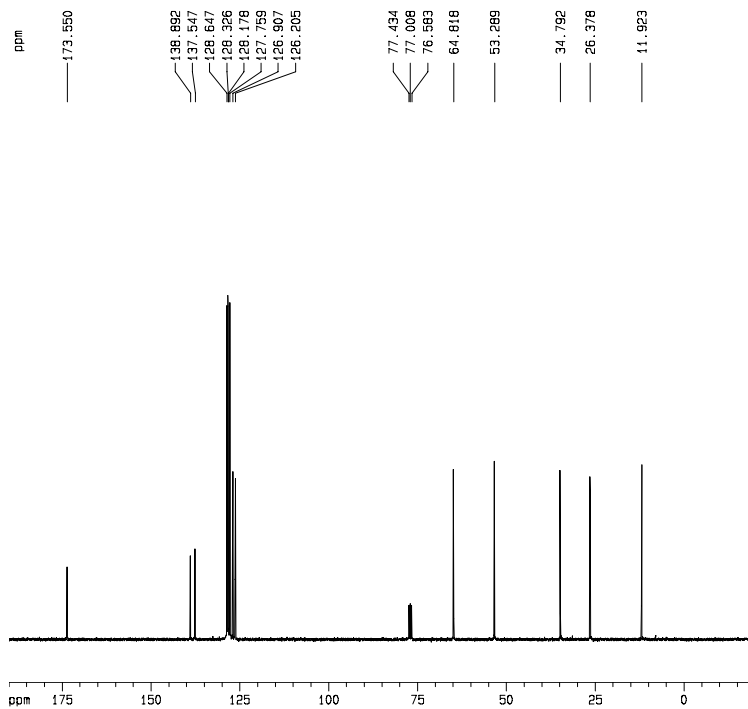

Current Data Parameters  
 NAME wxn27-1  
 EXPNO 2  
 PROCNO 1

F2 - Acquisition Parameters  
 Date\_ 20080103  
 Time 23.49  
 INSTRUM av300  
 PROBHD 5 mm DUL 13C-1  
 PULPROG zgpg30  
 ID 65536  
 SOLVENT CDCl3  
 NS 102  
 DS 4  
 SWH 17985.611 Hz  
 FIDRES 0.274438 Hz  
 AQ 1.8219598 sec  
 RG 1824.6  
 JW 27.800 usec  
 DE 6.00 usec  
 TE 295.0 K  
 D1 2.0000000 sec  
 D11 0.0300000 sec  
 D12 0.0002000 sec

===== CHANNEL f1 =====  
 NUC1 13C  
 P1 12.50 usec  
 PL1 2.00 dB  
 SFO1 75.4752953 MHz

===== CHANNEL f2 =====  
 P2PRG2 waltz16  
 NUC2 1H  
 P2PRG2 80.00 usec  
 PL2 -1.00 dB  
 PL12 16.98 dB  
 PL13 18.00 dB  
 SFO2 300.1312906 MHz

F2 - Processing parameters  
 SI 32768  
 SF 75.4677784 MHz  
 KDN EM  
 SSB 0  
 LB 1.00 Hz  
 GB 0  
 PC 1.40

1D NMR plot parameters  
 CX 20.00 cm  
 CY 6.00 cm  
 F1 190.000 ppm  
 F2 14338.88 Hz  
 F3 -50.000 ppm  
 F4 -3773.35 Hz  
 PPMCM 12.00000 ppm/cm  
 IZCM 905.61334 Hz/cm



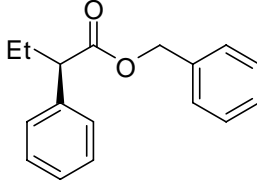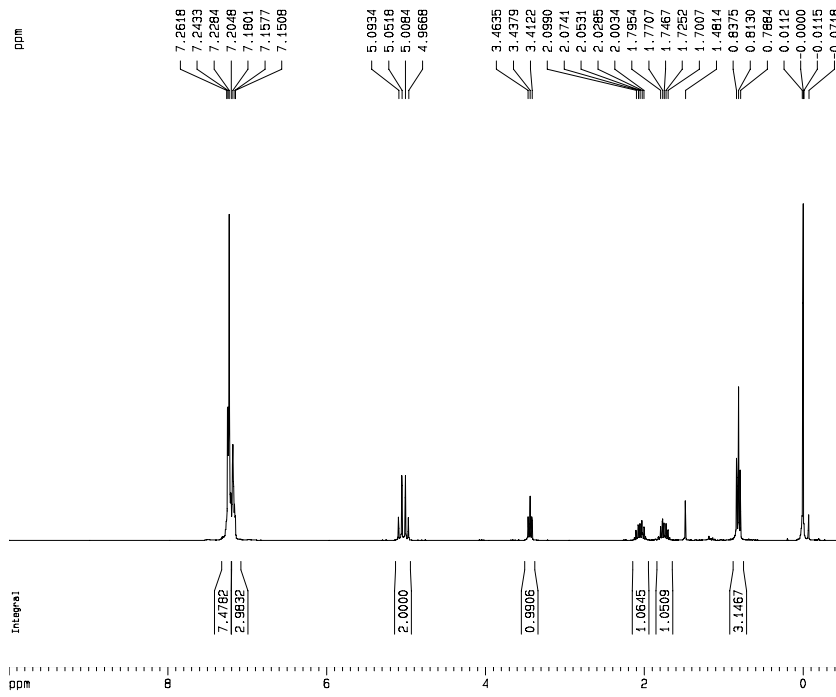

```

Current Data Parameters
NAME      wxn22-1
EXPNO    1
PROCNO   1

F2 - Acquisition Parameters
Date_    20071219
Time     23.55
INSTRUM  av300
PROBHD   5 mm DUL 13C-1
PULPROG  zg30
TD        65536
SOLVENT  CDCl3
NS        16
DS        0
SWH       8892.806 Hz
FIDRES    0.137219 Hz
AQ        3.6438615 sec
RG        256
DM        55.600 usec
DE        6.00 usec
TE        297.0 K
SI        5.00000000 sec

===== CHANNEL f1 =====
NUC1      1H
P1        10.00 usec
PL1       -1.00 dB
SFO1     300.1314634 Mhz

F2 - Processing parameters
SI        32768
SF        300.1300299 Mhz
WDW       EM
SSB       0
LB        0.35 Hz
GB        0
PC        1.00

1D NMR plot parameters
CX        20.00 cm
CY        8.00 cm
F1P       10.000 ppm
F1        3001.30 Hz
F2P       -0.500 ppm
F2        -150.07 Hz
PPMCM    0.52500 ppm/cm
HZCM     157.55627 Hz/cm
  
```

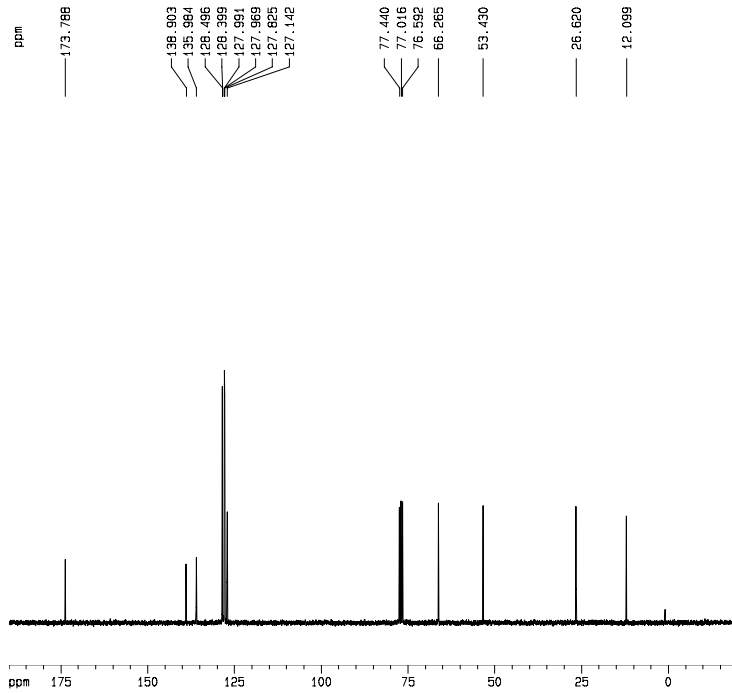

```

Current Data Parameters
NAME      wxn21-4
EXPNO    2
PROCNO   1

F2 - Acquisition Parameters
Date_    20071216
Time     17.45
INSTRUM  av300
PROBHD   5 mm DUL 13C-1
PULPROG  zgpg30
TD        65536
SOLVENT  CDCl3
NS        125
DS        4
SWH       17895.511 Hz
FIDRES    0.274439 Hz
AQ        1.8219566 sec
RG        1024
DM        27.800 usec
DE        6.00 usec
TE        298.8 K
SI        2.00000000 sec
SI1       0.43000000 sec
SI2       0.00002000 sec

===== CHANNEL f1 =====
NUC1      13C
P1        12.20 usec
PL1       -0.32 dB
SFO1     75.4752953 Mhz

===== CHANNEL f2 =====
PULPROG2 wa1z16
NUC2      1H
PCPRG2   80.00 usec
PL2       -1.00 dB
PL12      16.56 dB
PL13      19.00 dB
SFO2     300.1312005 Mhz

F2 - Processing parameters
SI        32768
SF        75.4677575 Mhz
WDW       EM
SSB       0
LB        1.00 Hz
GB        0
PC        1.40

1D NMR plot parameters
CX        20.00 cm
CY        6.00 cm
F1P       190.000 ppm
F1        14338.87 Hz
F2P       -50.000 ppm
F2        -3773.39 Hz
PPMCM    12.00000 ppm/cm
HZCM     905.61310 Hz/cm
  
```

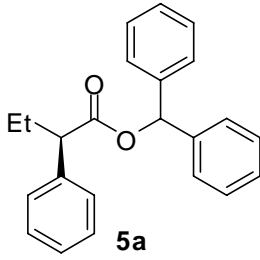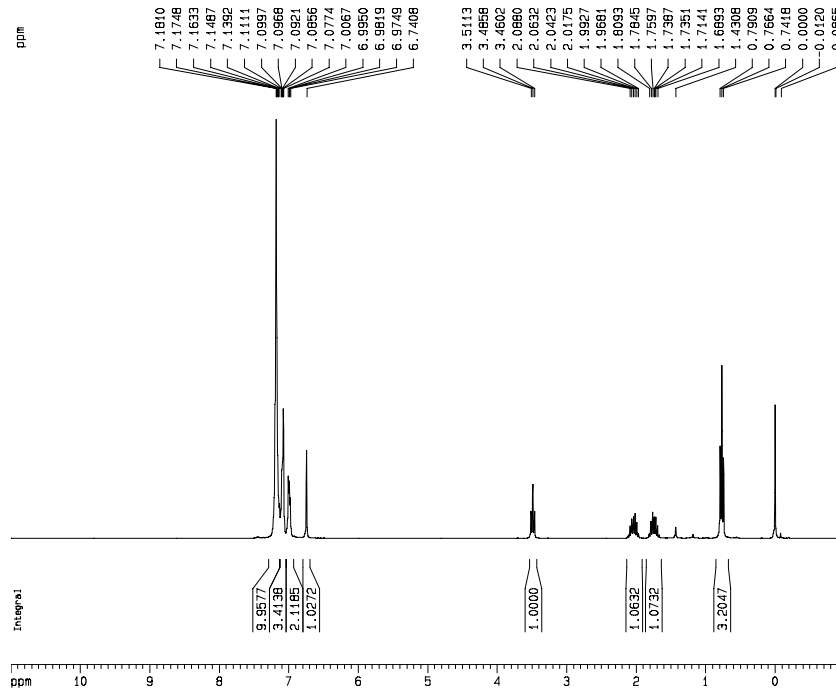

```

Current Data Parameters
NAME          wxn66-1
EXPNO        10
PROCNO       1

F2 - Acquisition Parameters
Date_        20080526
Time         18.56
INSTRUM      spect
PROBHD       5 mm DUL 13C-1
PULPROG      zg30
TD            65536
SOLVENT      CDCl3
NS            16
DS            0
SWH           8892.806 Hz
FIDRES        0.137219 Hz
AQ            3.6438515 sec
RG            64
SW           55.600 usec
DE            6.00 usec
TE            301.4 K
SI            1.00000000 sec
MCREST       0.00000000 sec
MORPK        0.01500000 sec

***** CHANNEL f1 *****
NUC1          1H
P1            7.00 usec
PL1           -1.00 dB
SFO1         300.1324010 MHz

F2 - Processing parameters
SI            32788
SF           300.1300561 MHz
WDW           EM
SSB           0
LB            0.30 Hz
GB            0
PC            1.00

1D NMR plot parameters
CX            20.00 cm
CY            10.00 cm
F1P           11.000 ppm
F1            3301.43 Hz
F2P           -1.000 ppm
F2            -300.13 Hz
PMCM         0.65000 ppm/cm
ZCM          180.07805 Hz/cm
  
```

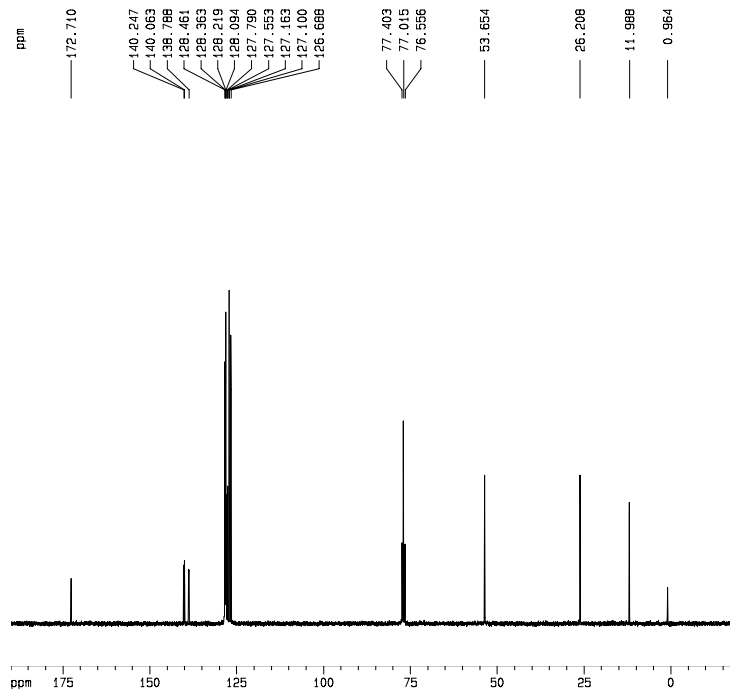

```

Current Data Parameters
NAME          wxn66-1
EXPNO        11
PROCNO       1

F2 - Acquisition Parameters
Date_        20080526
Time         19.00
INSTRUM      spect
PROBHD       5 mm DUL 13C-1
PULPROG      zgpg30
TD            65536
SOLVENT      CDCl3
NS            270
DS            4
SWH           17885.614 Hz
FIDRES        0.274438 Hz
AQ            1.8218508 sec
RG            382
SW           27.800 usec
DE            6.00 usec
TE            302.2 K
SI            2.00000000 sec
M11           0.63000000 sec
DELTA        1.89999998 sec
MCREST       0.00000000 sec
MORPK        0.01500000 sec

***** CHANNEL f1 *****
NUC1          13C
P1            12.50 usec
PL1            2.00 dB
SFO1         75.4752853 MHz

***** CHANNEL f2 *****
PROPRG2      waltz16
NUC2          1H
PCPRG2       80.00 usec
PL2           -1.00 dB
PL12         20.16 dB
PL13         16.98 dB
SFO2         300.1315005 MHz

F2 - Processing parameters
SI            32788
SF           75.4677584 MHz
WDW           EM
SSB           0
LB            1.00 Hz
GB            0
PC            1.40

1D NMR plot parameters
CX            20.00 cm
CY            8.00 cm
F1P           136.000 ppm
F1            14338.87 Hz
F2P           -50.000 ppm
F2            -3773.35 Hz
PMCM         12.00000 ppm/cm
ZCM          905.81310 Hz/cm
  
```

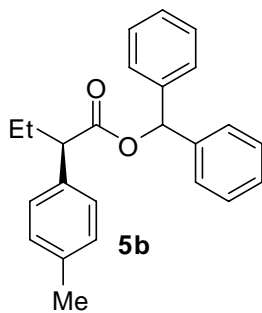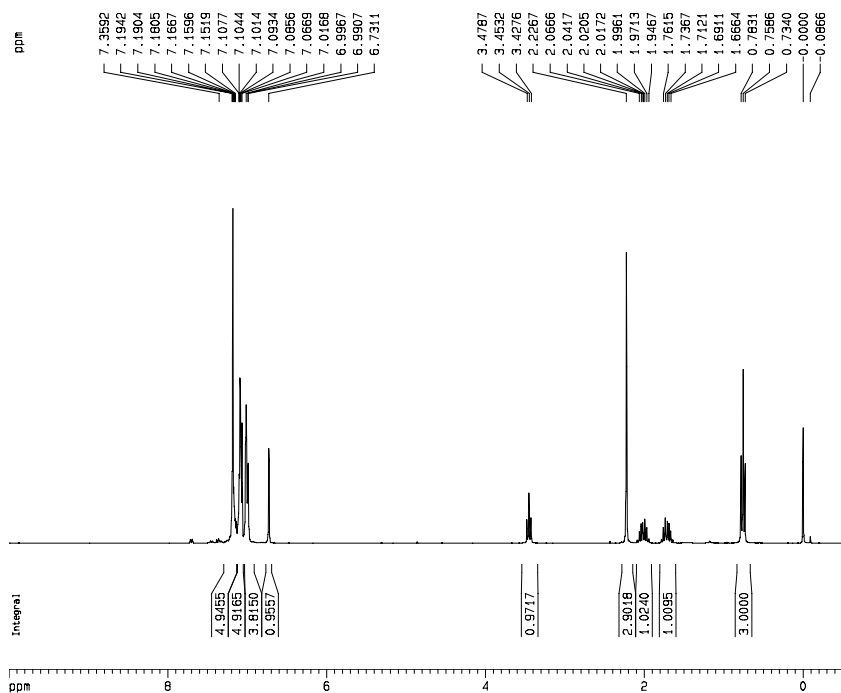

```
Current Data Parameters
NAME      wxn83-4
EXPNO    20
PROCNO   1

*2 - Acquisition Parameters
Date_    20080528
Time     8.54
INSTRUM  spect
PROBHD   5 mm DUL 13C-1
PULPROG  zg30
TD       65536
SOLVENT  CDCl3
NS       16
DS       0
SWH      8892.806 Hz
FIDRES   0.137219 Hz
AQ       3.6438615 sec
RG       50.8
DM       55.600 usec
DE       6.00 usec
TE       273.2 K
SI       1.00000000 sec
MCREST   0.00000000 sec
MORPK    0.01500000 sec
```

```
***** CHANNEL f1 *****
NUC1     1H
P1       7.00 usec
PL1      -1.00 dB
SFO1    300.1324010 MHz
```

```
*2 - Processing parameters
SI       32768
SF       300.1300567 MHz
WDW      EM
SSB      0
.B       0.30 Hz
SFB      0
GC       1.00
```

```
ID NMR plot parameters
CX       20.00 cm
CY       8.00 cm
F1P      10.000 ppm
F1       3001.30 Hz
F2P      -0.500 ppm
F2       -150.07 Hz
PMOCH    0.52500 ppm/cm
ZCM      157.56828 Hz/cm
```

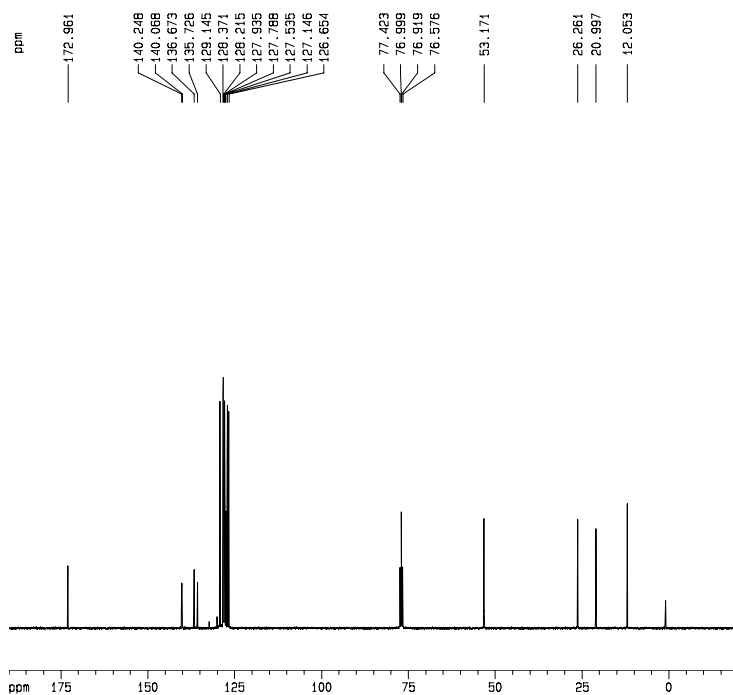

```
Current Data Parameters
NAME      wxn83-4
EXPNO    11
PROCNO   1
```

```
*2 - Acquisition Parameters
Date_    20080528
Time     7.42
INSTRUM  spect
PROBHD   5 mm DUL 13C-1
PULPROG  zgpg30
TD       65536
SOLVENT  CDCl3
NS       778
DS       4
SWH      17995.614 Hz
FIDRES   0.274428 Hz
AQ       1.8218508 sec
RG       512
DM       27.800 usec
DE       6.00 usec
TE       273.2 K
SI       2.00000000 sec
M11      0.03000000 sec
DELTA    1.89999998 sec
MCREST   0.00000000 sec
MORPK    0.01500000 sec
```

```
***** CHANNEL f1 *****
NUC1     13C
P1       12.50 usec
PL1      2.00 dB
SFO1    75.4752893 MHz
```

```
***** CHANNEL f2 *****
PDPROG2  waltz16
NUC2     1H
P2P2     80.00 usec
PL2      -1.00 dB
PL12     20.16 dB
PL13     16.98 dB
SFO2    300.1312005 MHz
```

```
*2 - Processing parameters
SI       32768
SF       75.4677697 MHz
WDW      EM
SSB      0
.B       1.00 Hz
SFB      0
GC       1.40
```

```
ID NMR plot parameters
CX       20.00 cm
CY       6.00 cm
F1P      130.000 ppm
F1       14338.87 Hz
F2P      -50.000 ppm
F2       -3773.39 Hz
PMOCH    12.00000 ppm/cm
ZCM      955.81310 Hz/cm
```

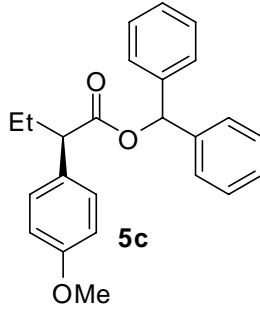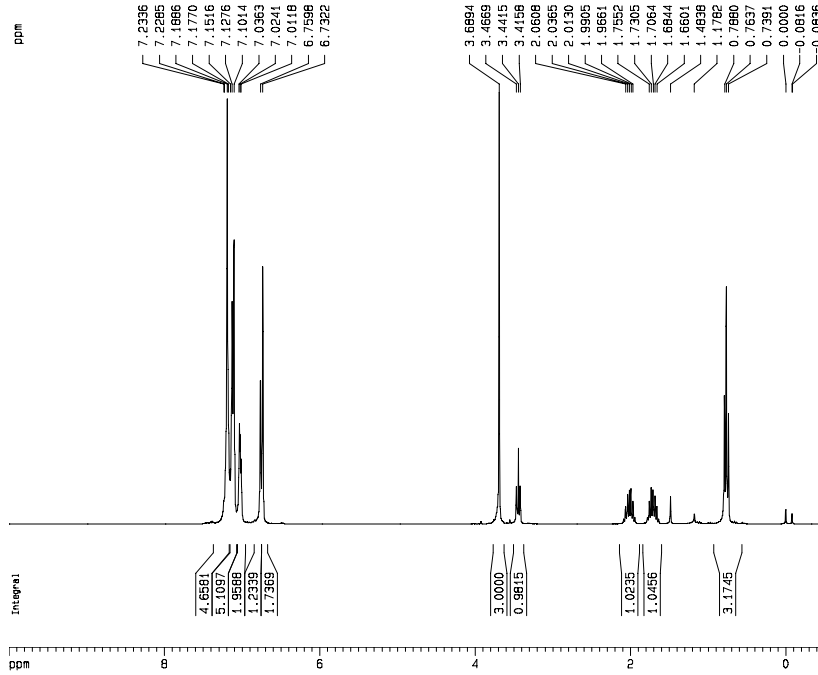

```

Current Data Parameters
NAME          wnr86-2
EXPNO        10
PROCNO       1

F2 - Acquisition Parameters
Date_        20080825
Time         8.08
INSTRUM     spect
PROBHD      5 mm DUL 13C-1
PULPROG     zg30
TD           65536
SOLVENT     CDCl3
NS           16
DS           0
SWH          8992.806 Hz
FIDRES      0.137219 Hz
AQ           3.6438515 sec
RG           80.0
DM           55.600 usec
DE           6.00 usec
TE           299.0 K
D1           1.00000000 sec
MCREST      0.00000000 sec
MCKR        0.01500000 sec

***** CHANNEL f1 *****
NUC1         1H
P1           7.00 usec
PL1          -1.00 dB
SFO1         300.1324010 MHz

F2 - Processing parameters
SI           32768
SF           300.1300452 MHz
WDW          EM
SSB          0
LB           0.30 Hz
GB           0
PC           1.00

1D NMR plot parameters
CX           20.00 cm
CY           12.50 cm
F1P          10.000 ppm
F1           3001.30 Hz
F2P          -0.500 ppm
F2           -150.07 Hz
PPMCM        0.52500 ppm/cm
HZCM         157.56827 Hz/cm
  
```

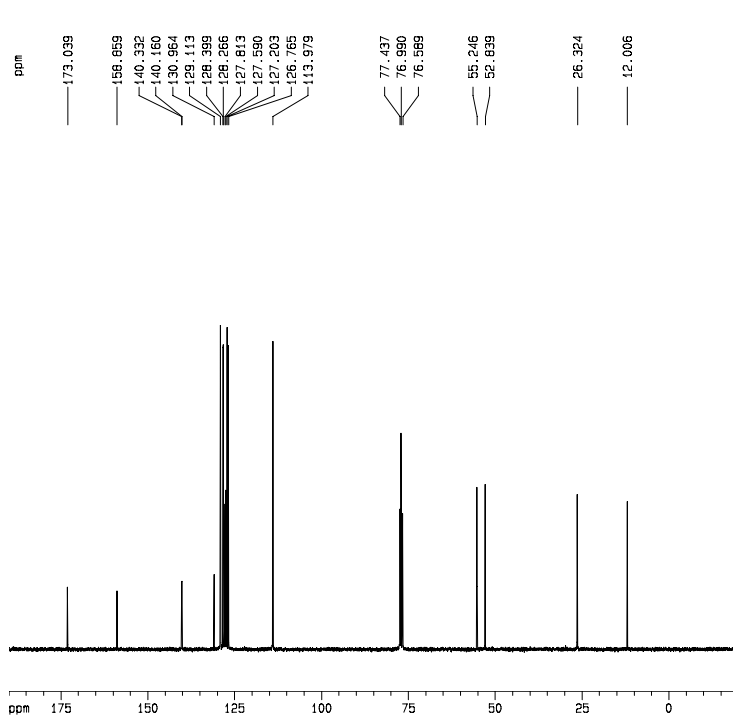

```

Current Data Parameters
NAME          wnr86-2
EXPNO        11
PROCNO       1

F2 - Acquisition Parameters
Date_        20080926
Time         8.14
INSTRUM     spect
PROBHD      5 mm DUL 13C-1
PULPROG     zgpg30
TD           65536
SOLVENT     CDCl3
NS           747
DS           4
SWH          17985.614 Hz
FIDRES      0.274428 Hz
AQ           1.8219508 sec
RG           1149.4
DM           27.800 usec
DE           6.00 usec
TE           301.2 K
D1           2.00000000 sec
D11          0.03000000 sec
DELTA        1.89999998 sec
MCREST      0.00000000 sec
MCKR        0.01500000 sec

***** CHANNEL f1 *****
NUC1         13C
P1           12.50 usec
PL1          2.00 dB
SFO1         75.4752993 MHz

***** CHANNEL f2 *****
PDPORG2      waltz16
NUC2         1H
P2           80.00 usec
PL2          -1.00 dB
PL12         20.16 dB
PL13         16.38 dB
SFO2         300.1315003 MHz

F2 - Processing parameters
SI           32768
SF           75.4677509 MHz
WDW          EM
SSB          0
LB           1.00 Hz
GB           0
PC           1.40

1D NMR plot parameters
CX           20.00 cm
CY           8.00 cm
F1P          130.000 ppm
F1           14338.87 Hz
F2P          -50.000 ppm
F2           -3773.39 Hz
PPMCM        12.00000 ppm/cm
HZCM         905.81298 Hz/cm
  
```

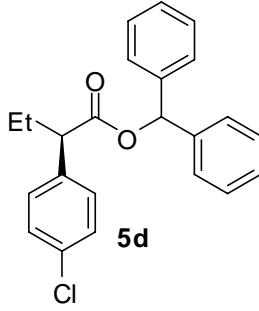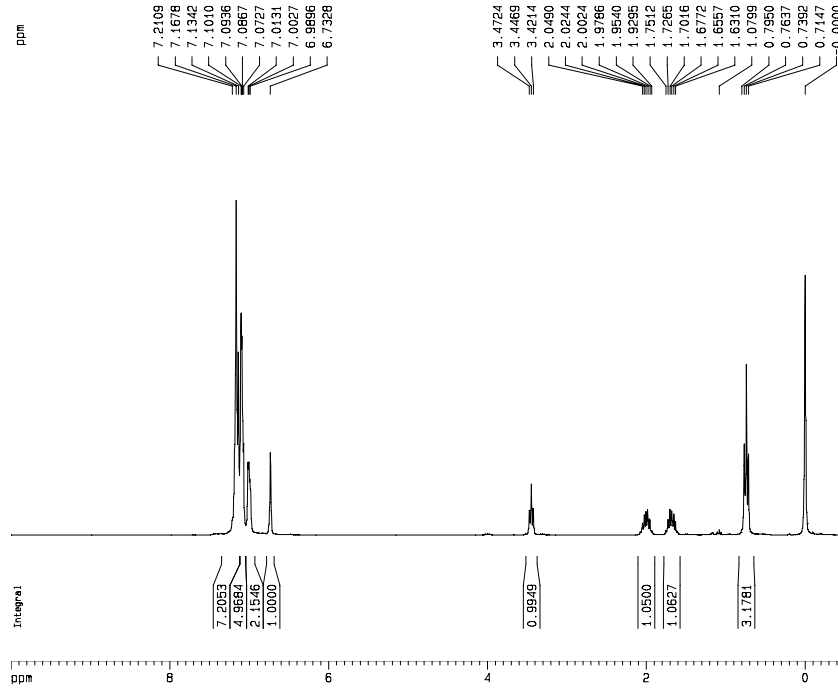

```

Current Data Parameters
NAME          wxn77-1
EXPNO        20
PROCNO       1

F2 - Acquisition Parameters
Date_        20080530
Time         16.43
INSTRUM     spect
PROBHD      5 mm DUL 13C-1
PULPROG     zg30
TD           65536
SOLVENT     CDCl3
NS           16
DS           0
SWH          8992.806 Hz
FIDRES       0.137219 Hz
AQ           3.6438915 sec
RG            40.3
SW           55.600 usec
DE            6.00 usec
TE           273.2 K
SI           1.00000000 sec
MCREST       0.00000000 sec
MORPK        0.01500000 sec

===== CHANNEL f1 =====
NUC1          13C
P1            7.00 usec
PL1           -1.00 dB
SFO1         300.1324010 MHz

F2 - Processing parameters
SI            32768
SF           300.1300623 MHz
WDW           EM
SSB           0
LB            0.30 Hz
GB            0
PC            1.00

1D NMR plot parameters
CX            20.00 cm
CY            8.00 cm
FIP           10.000 ppm
F1            3001.30 Hz
F2            -0.500 ppm
F3            -150.07 Hz
PPMCM        0.52500 ppm/cm
HZCM         157.56828 Hz/cm

```

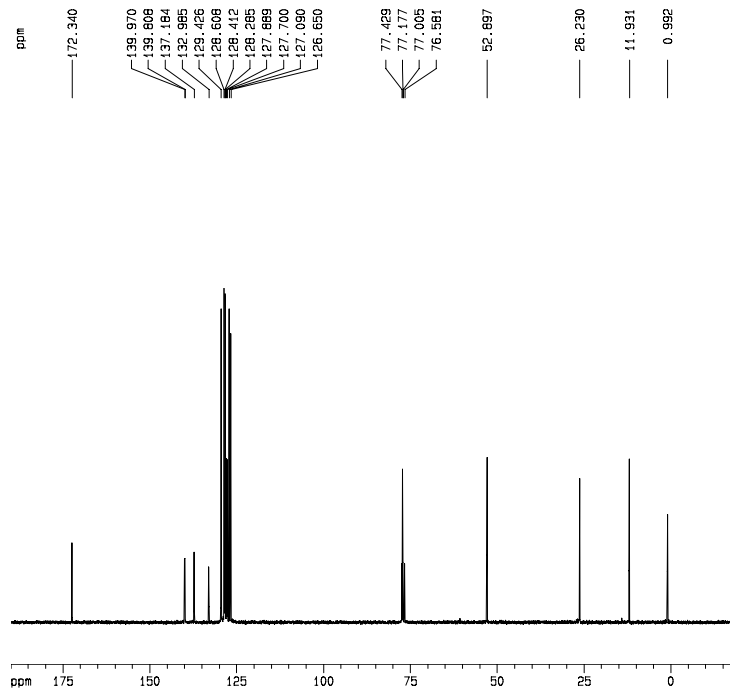

```

Current Data Parameters
NAME          wxn77-1
EXPNO        21
PROCNO       1

F2 - Acquisition Parameters
Date_        20080530
Time         16.48
INSTRUM     spect
PROBHD      5 mm DUL 13C-1
PULPROG     zgpg30
TD           65536
SOLVENT     CDCl3
NS           225
DS           4
SWH          17985.614 Hz
FIDRES       0.274428 Hz
AQ           1.8219508 sec
RG            845.1
SW           27.800 usec
DE            6.00 usec
TE           273.2 K
SI           2.00000000 sec
M11          0.03000000 sec
DELTA        1.89999998 sec
MCREST       0.00000000 sec
MORPK        0.01500000 sec

===== CHANNEL f1 =====
NUC1          13C
P1            12.50 usec
PL1            2.00 dB
SFO1         75.4752893 MHz

===== CHANNEL f2 =====
PDPORG2      waltz16
NUC2          1H
P2           80.00 usec
PL2           -1.00 dB
PL12         20.16 dB
PL13         16.38 dB
SFO2         300.1315003 MHz

F2 - Processing parameters
SI            32768
SF           75.4677608 MHz
WDW           EM
SSB           0
LB            1.00 Hz
GB            0
PC            1.40

1D NMR plot parameters
CX            20.00 cm
CY            8.00 cm
FIP           130.000 ppm
F1            14338.87 Hz
F2            -50.000 ppm
F3            -3773.39 Hz
PPMCM        12.00000 ppm/cm
HZCM         905.81310 Hz/cm

```

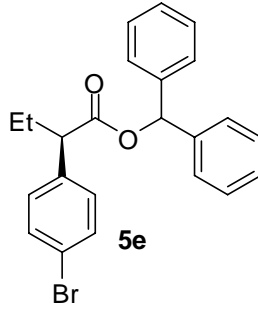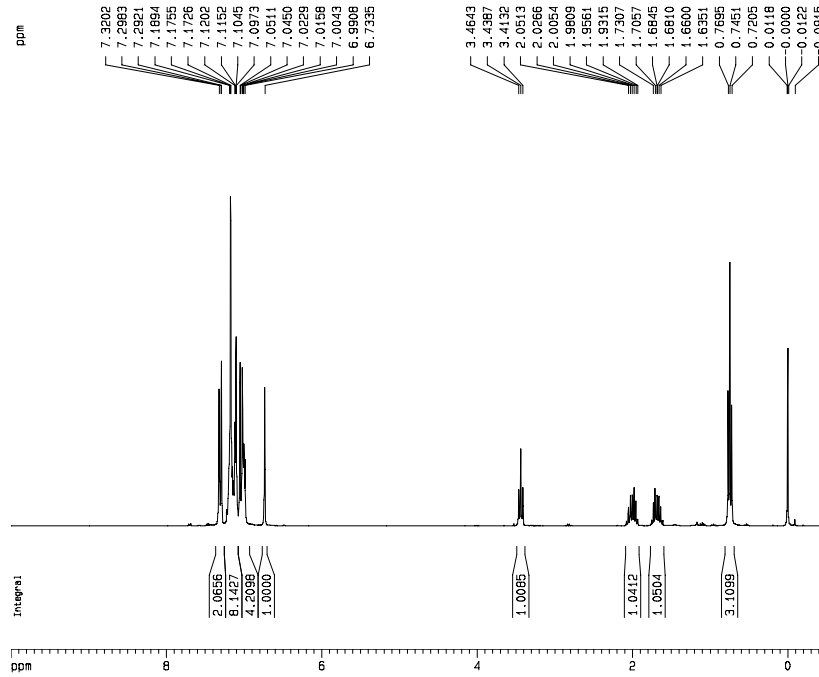

```

Current Data Parameters
NAME          wxn78-1
EXPNO         60
PROCNO        1

F2 - Acquisition Parameters
Date_         20080530
Time          17.04
INSTRUM       spect
PROBHD        5 mm DUL 13C-1
PULPROG       zg30
TD            65536
SOLVENT       CDCl3
NS            16
DS            0
SWH           8992.806 Hz
FIDRES        0.137215 Hz
AQ            3.6438515 sec
RG            46.3
DN            55.600 usec
DE            6.00 usec
TE            273.2 K
D1            1.0000000 sec
MCREST        0.0000000 sec
MCKKRC        0.0150000 sec

***** CHANNEL f1 *****
NUC1           1H
P1             7.00 usec
PL1            -1.00 dB
SFO1           300.1324010 MHz

F2 - Processing parameters
SI             32768
SF            300.1300572 MHz
WDW            EM
SSB            0
LB             0.30 Hz
GB             0
PC             1.00

1D NMR plot parameters
CX             20.00 cm
CY             8.00 cm
F1P            10.000 ppm
F1             3001.30 Hz
F2P            -0.500 ppm
F2             -150.07 Hz
PRMCM          0.32500 ppm/cm
HZCM           157.56828 Hz/cm
  
```

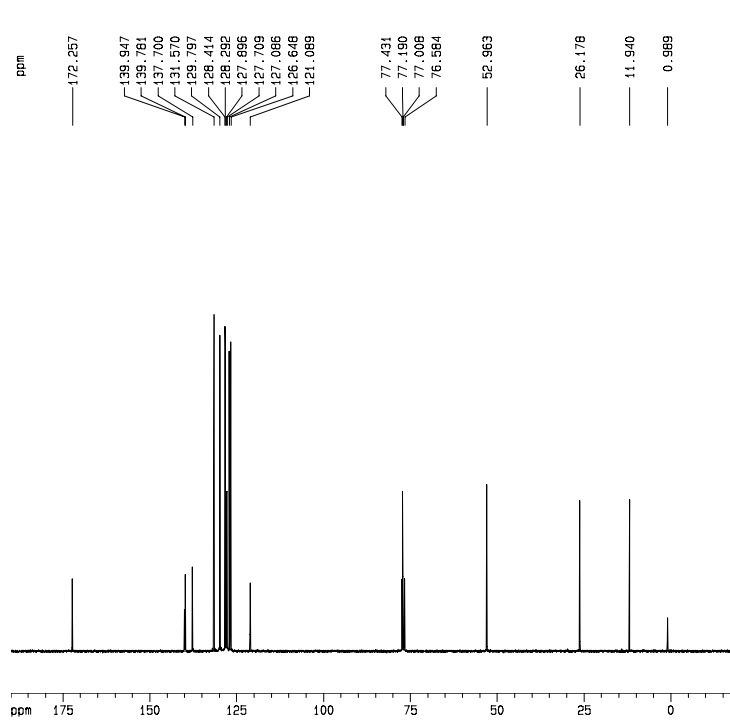

```

Current Data Parameters
NAME          wxn78-1
EXPNO         61
PROCNO        1

F2 - Acquisition Parameters
Date_         20080530
Time          17.09
INSTRUM       spect
PROBHD        5 mm DUL 13C-1
PULPROG       zgpg30
TD            65536
SOLVENT       CDCl3
NS            390
DS            4
SWH           17995.614 Hz
FIDRES        0.274429 Hz
AQ            1.8219508 sec
RG            724.1
DN            27.800 usec
DE            6.00 usec
TE            273.2 K
D1            2.0000000 sec
M11           0.0300000 sec
DELTA         1.8999999 sec
MCREST        0.0000000 sec
MCKKRC        0.0150000 sec

***** CHANNEL f1 *****
NUC1           13C
P1            12.50 usec
PL1            2.00 dB
SFO1           75.4752893 MHz

***** CHANNEL f2 *****
PDPROG2       waltz16
NUC2           1H
P2             80.00 usec
PL2            -1.00 dB
PL12           20.16 dB
PL13           16.98 dB
SFO2           300.1312005 MHz

F2 - Processing parameters
SI             32768
SF            75.4677693 MHz
WDW            EM
SSB            0
LB             1.00 Hz
GB             0
PC             1.40

1D NMR plot parameters
CX             20.00 cm
CY             8.00 cm
F1P            130.000 ppm
F1             14338.87 Hz
F2P            -50.000 ppm
F2             -3773.39 Hz
PRMCM          12.00000 ppm/cm
HZCM           955.81310 Hz/cm
  
```

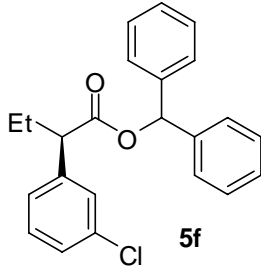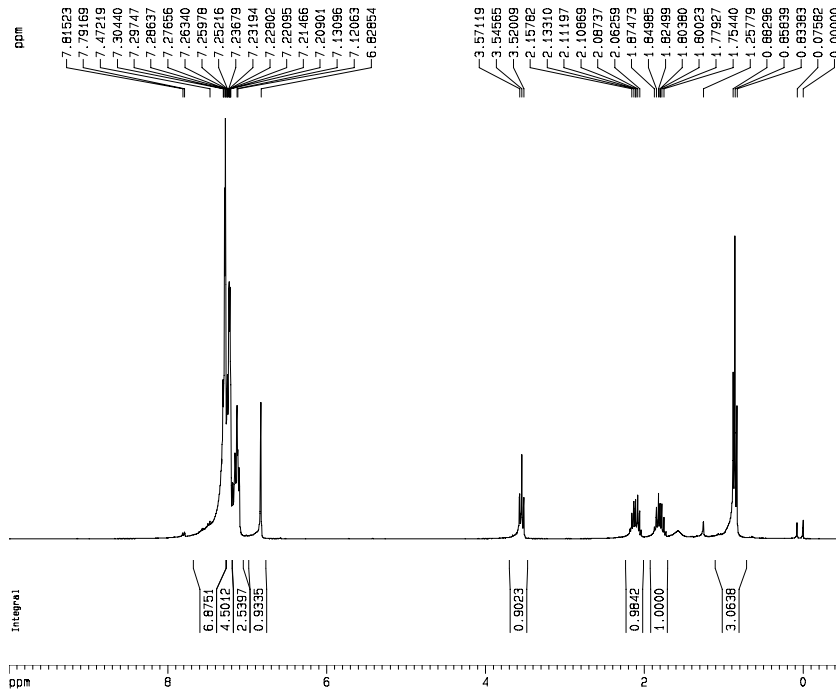

```

Current Data Parameters
NAME      wxn76-2
EXPNO    10
PROCNO   1

F2 - Acquisition Parameters
Date_    20080714
Time     15.58
INSTRUM  spect
PROBHD   5 mm DUL 13C-1
PULPROG  zg30
TD        65536
SOLVENT  CDCl3
VS        16
SFO      0
SMH      8992.806 Hz
FIDRES   0.137219 Hz
AQ       3.6438615 sec
RG        128
DM        55.600 usec
DE        6.00 usec
TE        300.7 K
D1        1.00000000 sec
dCREST   0.00000000 sec
dCMRKR   0.01500000 sec

***** CHANNEL f1 *****
NUC1      1H
P1        7.00 usec
PL1       -1.00 dB
SFO1     300.1324010 MHz

F2 - Processing parameters
SI        32768
SF        300.1300127 MHz
WDW       EM
SSB       0
LB        0.30 Hz
GB        0
PC        1.00

1D NMR plot parameters
CX        20.00 cm
CY        10.00 cm
F1P       10.000 ppm
F1        3001.30 Hz
F2P       -0.500 ppm
F2        -150.06 Hz
PPMCM    0.52500 ppm/cm
HZCM     157.56825 Hz/cm

```

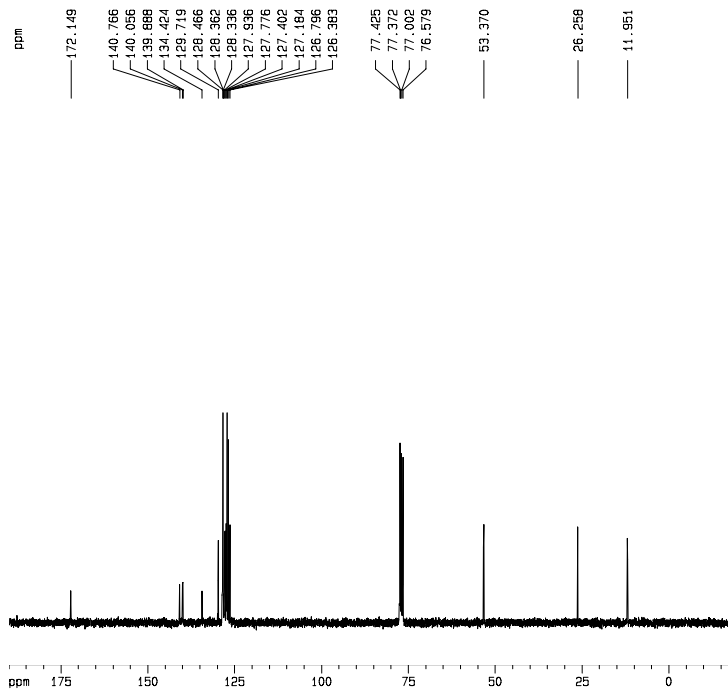

```

Current Data Parameters
NAME      wxn76-2
EXPNO    11
PROCNO   1

F2 - Acquisition Parameters
Date_    20080714
Time     16.02
INSTRUM  spect
PROBHD   5 mm DUL 13C-1
PULPROG  zgpg30
TD        65536
SOLVENT  CDCl3
VS        372
SFO      4
SMH      17985.611 Hz
FIDRES   0.234420 Hz
AQ       1.8219508 sec
RG        1448.2
DM        27.800 usec
DE        6.00 usec
TE        302.0 K
D1        2.00000000 sec
d11       0.00000000 sec
SOLTA    1.88989998 sec
dCREST   0.00000000 sec
dCMRKR   0.01500000 sec

***** CHANNEL f1 *****
NUC1      13C
P1        12.00 usec
PL1       -1.00 dB
SFO1     75.4752953 MHz

***** CHANNEL f2 *****
PULPROG  waltz16
NUC2      1H
dP2P2    80.00 usec
PL2      -1.00 dB
PL12     20.16 dB
PL13     16.98 dB
SFO2    300.1312005 MHz

F2 - Processing parameters
SI        32768
SF        75.4677482 MHz
WDW       EM
SSB       0
LB        1.00 Hz
GB        0
PC        1.40

1D NMR plot parameters
CX        20.00 cm
CY        5.00 cm
F1P       190.000 ppm
F1        14338.87 Hz
F2P       -50.000 ppm
F2        -3773.39 Hz
PPMCM    12.00000 ppm/cm
HZCM     905.61298 Hz/cm

```

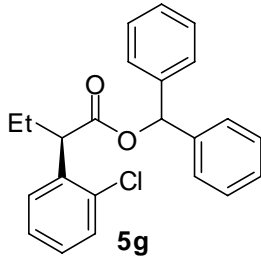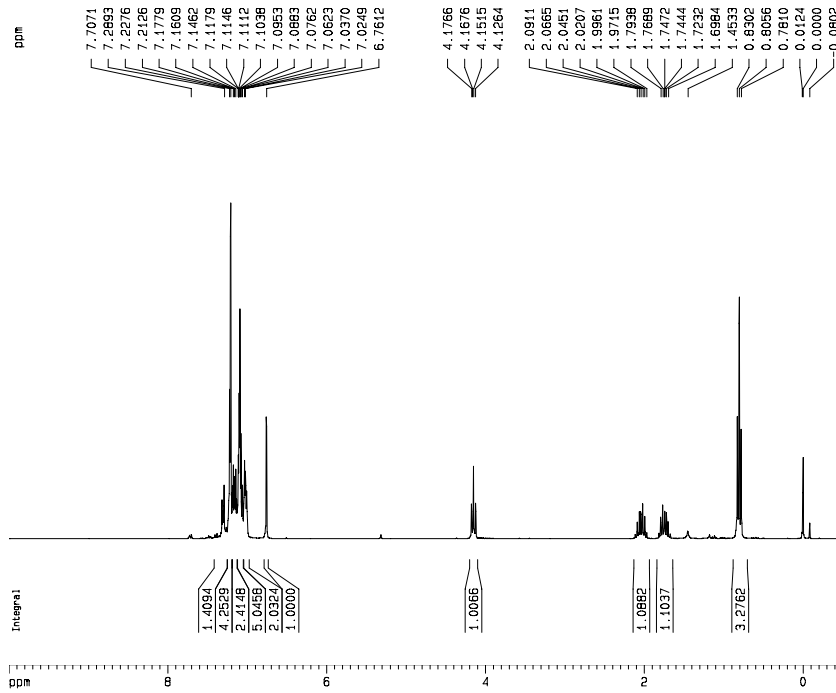

```

Current Data Parameters
NAME          wxnB4-2
EXPNO        10
PROCNO       1

*2 - Acquisition Parameters
Date_        20080523
Time         21.44
INSTRUM      spect
PROBHD       5 mm DUL 13C-1
PULPROG      zg30
TD            65536
SOLVENT      CDCl3
NS            16
DS            0
SWH           8892.806 Hz
FIDRES       0.137219 Hz
AQ            3.6438615 sec
RG            101.6
KW            55.600 usec
DE            6.00 usec
TE            301.1 K
SI            1.0000000 sec
CH1          0.0000000 sec
MCREST       0.0000000 sec
MORPR        0.0150000 sec

===== CHANNEL f1 =====
NUC1          1H
P1            7.00 usec
PL1           -1.00 dB
SFO1          300.1324010 MHz

*2 - Processing parameters
SI            32768
SF            300.1300425 MHz
WDW           EM
SSB           0
LB            0.30 Hz
GB            0
PC            1.00

ID NMR plot parameters
CX            20.00 cm
CY            8.00 cm
F1P           10.000 ppm
F1            3001.30 Hz
F2            -0.500 ppm
F2            -150.07 Hz
PRMCM         0.52500 ppm/cm
HZCM          157.56827 Hz/cm
  
```

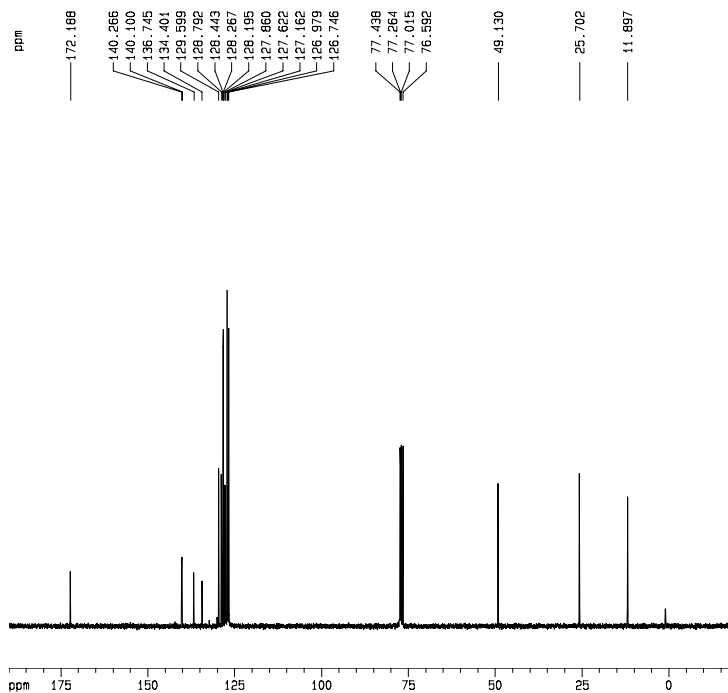

```

Current Data Parameters
NAME          wxnB4-2
EXPNO        11
PROCNO       1

*2 - Acquisition Parameters
Date_        20080523
Time         21.48
INSTRUM      spect
PROBHD       5 mm DUL 13C-1
PULPROG      zgpg30
TD            65536
SOLVENT      CDCl3
NS            419
DS            4
SWH           17995.614 Hz
FIDRES       0.274429 Hz
AQ            1.8218508 sec
RG            382
KW            27.800 usec
DE            6.00 usec
TE            302.0 K
SI            2.0000000 sec
CH1          0.0300000 sec
DELTA        1.8999998 sec
MCREST       0.0000000 sec
MORPR        0.0150000 sec

===== CHANNEL f1 =====
NUC1          13C
P1            12.50 usec
PL1           2.00 dB
SFO1          75.4752993 MHz

===== CHANNEL f2 =====
PDPROG2      waltz16
NUC2          1H
P2            80.00 usec
PL2           -1.00 dB
PL12          20.16 dB
PL13          16.98 dB
SFO2          300.1312005 MHz

*2 - Processing parameters
SI            32768
SF            75.4677453 MHz
WDW           EM
SSB           0
LB            1.00 Hz
GB            0
PC            1.40

ID NMR plot parameters
CX            20.00 cm
CY            8.00 cm
F1P           130.000 ppm
F1            14338.87 Hz
F2            -50.000 ppm
F2            -3773.39 Hz
PRMCM         12.00000 ppm/cm
HZCM          955.81298 Hz/cm
  
```



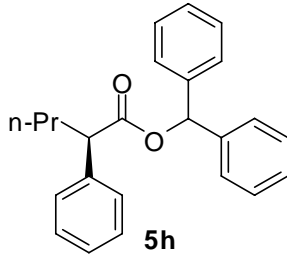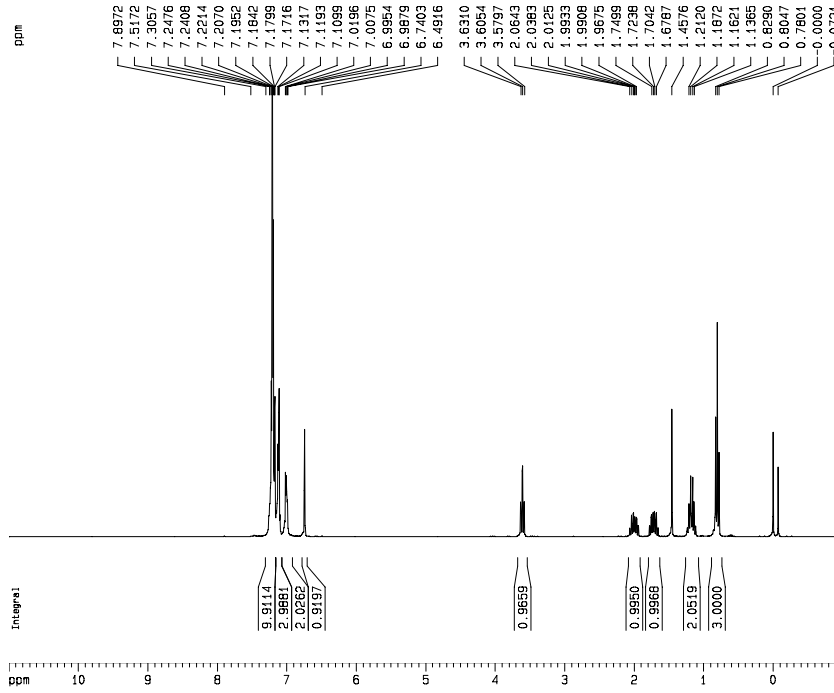

Current Data Parameters  
 NAME wxn99  
 EXPNO 10  
 PROCNO 1

F2 - Acquisition Parameters  
 Date\_ 20080714  
 Time 16.30  
 INSTRUM spect  
 PROBHD 5 mm DUL 13C-1  
 PULPROG zgpg30  
 ID 65936  
 SOLVENT CDCl3  
 VS 12  
 JS 0  
 SWH 8892.806 Hz  
 FIDRES 0.137219 Hz  
 AQ 3.6438615 sec  
 RG 228.1  
 SW 55.600 usec  
 DE 6.00 usec  
 TE 302.1 K  
 SI 1.00000000 sec  
 MCREST 0.00000000 sec  
 MDWRK 0.01500000 sec

===== CHANNEL f1 =====  
 NUC1 1H  
 P1 7.00 usec  
 PL1 -1.00 dB  
 SFO1 300.1324010 MHz

F2 - Processing parameters  
 SI 32788  
 SF 300.1300324 MHz  
 MDW EM  
 SSB 0  
 LB 0.30 Hz  
 SB 0  
 GC 1.00

ID NMR plot parameters  
 CX 20.00 cm  
 CY 12.50 cm  
 FIP 11.000 ppm  
 F1 3301.43 Hz  
 F2 -1.000 ppm  
 F3 -300.13 Hz  
 PPMCM 0.65000 ppm/cm  
 HZCM 180.07802 Hz/cm

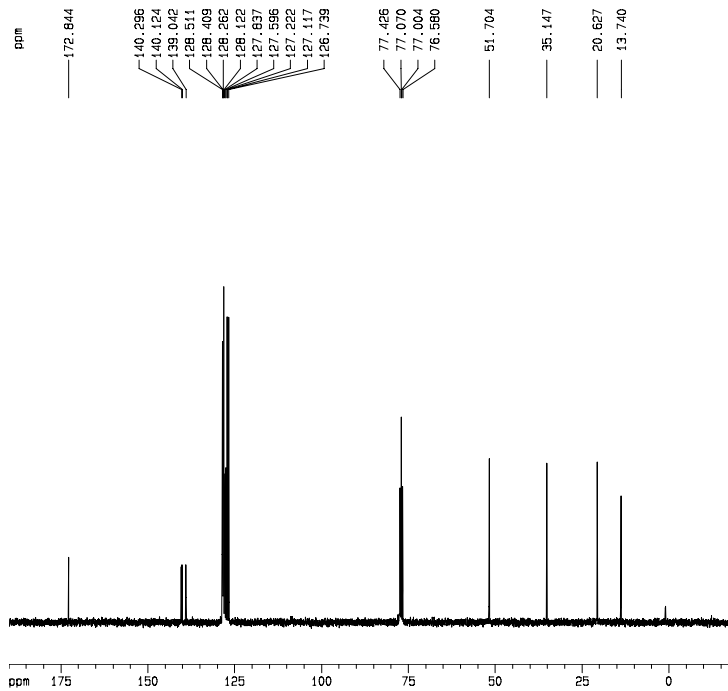

Current Data Parameters  
 NAME wxn99  
 EXPNO 3  
 PROCNO 1

F2 - Acquisition Parameters  
 Date\_ 20080715  
 Time 16.38  
 INSTRUM spect  
 PROBHD 5 mm DUL 13C-1  
 PULPROG zgpg30  
 ID 65936  
 SOLVENT CDCl3  
 VS 454  
 JS 4  
 SWH 17995.614 Hz  
 FIDRES 0.274426 Hz  
 AQ 1.8219508 sec  
 RG 512  
 SW 27.800 usec  
 DE 6.00 usec  
 TE 301.6 K  
 SI 2.00000000 sec  
 M1 0.03000000 sec  
 DELTA 1.89999998 sec  
 MCREST 0.00000000 sec  
 MDWRK 0.01500000 sec

===== CHANNEL f1 =====  
 NUC1 13C  
 P1 12.50 usec  
 PL1 2.00 dB  
 SFO1 75.4752893 MHz

===== CHANNEL f2 =====  
 PDPORG2 waltz16  
 NUC2 1H  
 P2 80.00 usec  
 PL2 -1.00 dB  
 PL12 20.16 dB  
 PL13 16.38 dB  
 SFO2 300.1315003 MHz

F2 - Processing parameters  
 SI 32788  
 SF 75.4677498 MHz  
 MDW EM  
 SSB 0  
 LB 1.00 Hz  
 SB 0  
 GC 1.40

ID NMR plot parameters  
 CX 20.00 cm  
 CY 8.00 cm  
 FIP 130.000 ppm  
 F1 14338.87 Hz  
 F2 -50.000 ppm  
 F3 -3773.39 Hz  
 PPMCM 12.00000 ppm/cm  
 HZCM 905.61298 Hz/cm

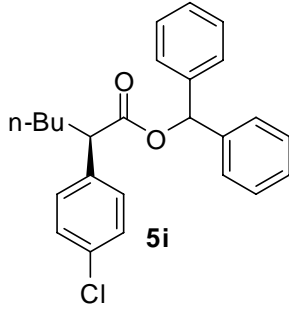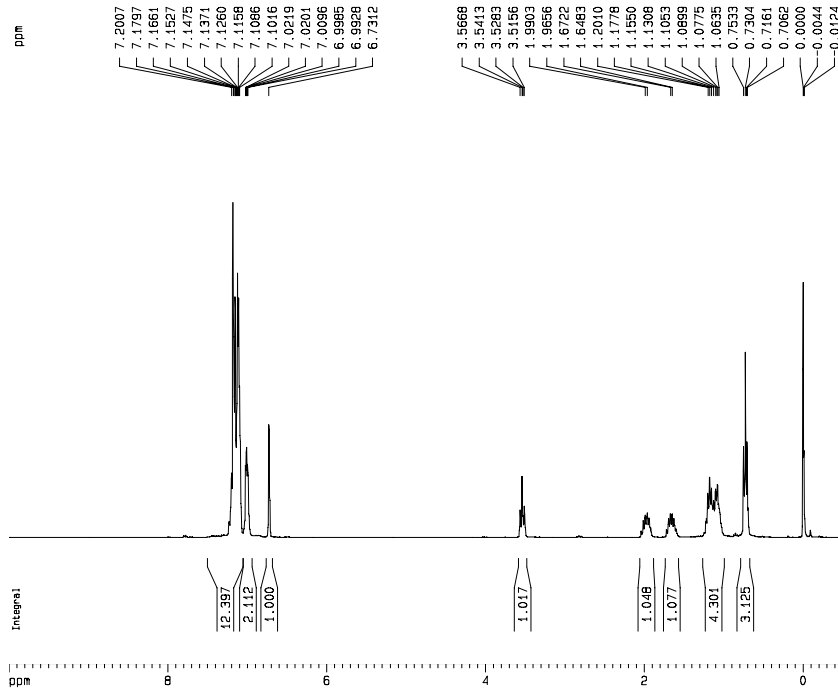

```

Current Data Parameters
NAME          wxn80
EXPNO        10
PROCNO       1

?2 - Acquisition Parameters
Date_        20080529
Time         21.15
INSTRUM      spect
PROBHD       5 mm DUL 13C-1
PULPROG      zg30
TD           65536
SOLVENT      CDCl3
NS           16
DS           0
SWH          8992.806 Hz
FIDRES       0.137219 Hz
AQ           3.6439619 sec
RG           50.8
JK           55.600 usec
JE           6.00 usec
TE           673.2 K
D1           1.00000000 sec
dCREST       0.00000000 sec
dCMRRC       0.01500000 sec

===== CHANNEL f1 =====
NUC1          1H
P1            7.00 usec
PL1          -1.00 dB
SFO1         300.1324010 MHz

?2 - Processing parameters
SI            32768
SF           300.1300604 MHz
WDW          EM
SSB          0
B            0.30 Hz
Sb           0
C            1.00

1D NMR plot parameters
CX           20.00 cm
CY           8.00 cm
F1P          10.000 ppm
F1           3001.30 Hz
F2P          -0.500 ppm
F2           -150.07 Hz
FPCMCN       0.52800 ppm/cm
FZCM         157.58827 Hz/cm
  
```

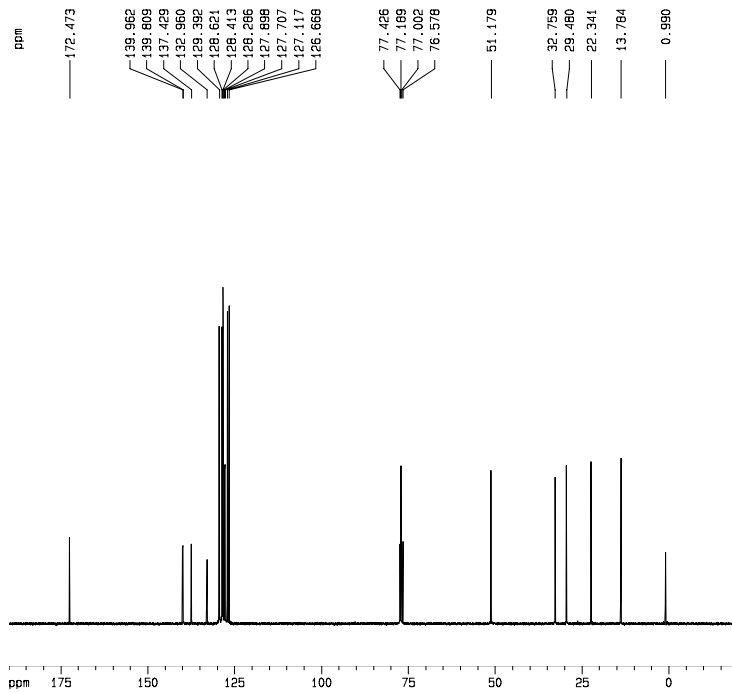

```

Current Data Parameters
NAME          wxn80
EXPNO        20
PROCNO       1

?2 - Acquisition Parameters
Date_        20080530
Time         16.08
INSTRUM      spect
PROBHD       5 mm DUL 13C-1
PULPROG      zgpg30
TD           65536
SOLVENT      CDCl3
NS           462
DS           4
SWH          17895.614 Hz
FIDRES       0.274439 Hz
AQ           1.8218508 sec
RG           512
JK           27.800 usec
JE           6.00 usec
TE           673.2 K
D1           2.00000000 sec
d11          0.03000000 sec
DELTA        1.89999998 sec
dCREST       0.00000000 sec
dCMRRC       0.01500000 sec

===== CHANNEL f1 =====
NUC1          13C
P1           12.00 usec
PL1          2.00 dB
SFO1         75.4752953 MHz

===== CHANNEL f2 =====
PROPRG2      waltz16
NUC2          1H
PCPD2        80.00 usec
PL2          -1.00 dB
PL12         20.16 dB
PL13         16.98 dB
SFO2         300.1315003 MHz

?2 - Processing parameters
SI            32768
SF           75.4677695 MHz
WDW          EM
SSB          0
B            1.00 Hz
Sb           0
C            1.40

1D NMR plot parameters
CX           20.00 cm
CY           8.00 cm
F1P          136.000 ppm
F1           14338.87 Hz
F2P          -50.000 ppm
F2           -3773.35 Hz
FPCMCN       12.00000 ppm/cm
FZCM         906.61310 Hz/cm
  
```

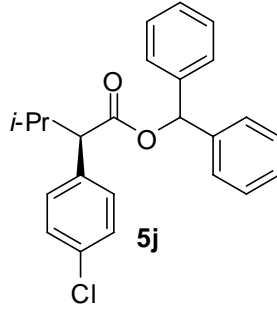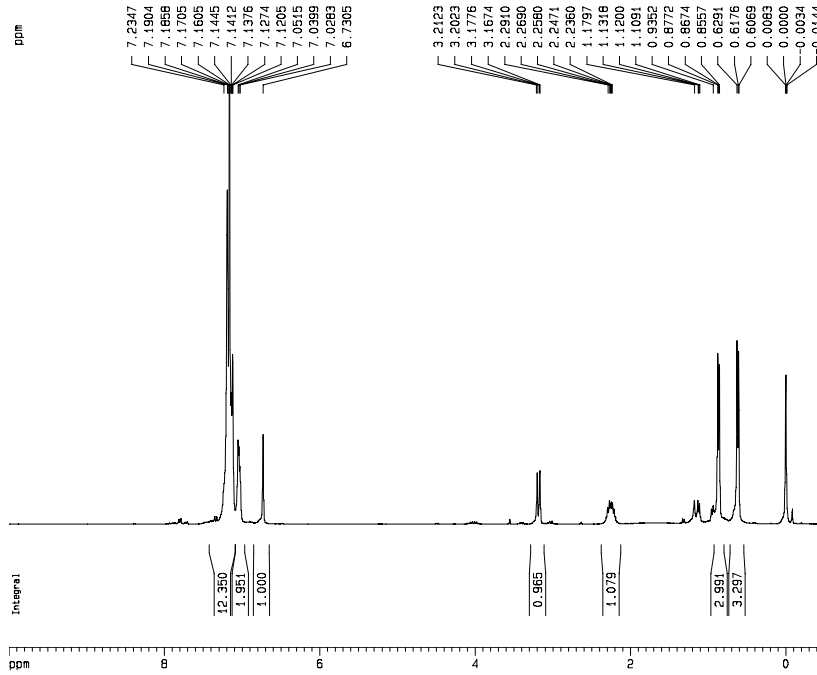

```

Current Data Parameters
NAME          wxn84-3
EXPNO        10
PROCNO       1

F2 - Acquisition Parameters
Date_        20080714
Time         16.39
INSTRUM      spect
PROBHD       5 mm DUL 13C-1
PULPROG      zg30
TD           65536
SOLVENT      CDCl3
NS           16
DS           0
SWH          8992.805 Hz
FIDRES       0.137219 Hz
AQ           3.6438515 sec
RG           90.5
DN           65.600 usec
DC           6.00 usec
TE           301.5 K
D1           1.00000000 sec
MCREST       0.00000000 sec
MKRKR        0.01500000 sec

***** CHANNEL f1 *****
NUC1         1H
P1           7.00 usec
PL1          -1.00 dB
SFO1         300.1324010 MHz

F2 - Processing parameters
SI           32768
SF           300.1300396 MHz
WDW          EM
SSB          0
LB           0.30 Hz
GB           0
PC           1.00

1D NMR plot parameters
CX           20.00 cm
CY           12.50 cm
F1P          10.000 ppm
F1           3001.30 Hz
F2P          -0.500 ppm
F2           -150.07 Hz
FREQCM       0.52500 ppm/cm
HZCM         157.56827 Hz/cm
  
```

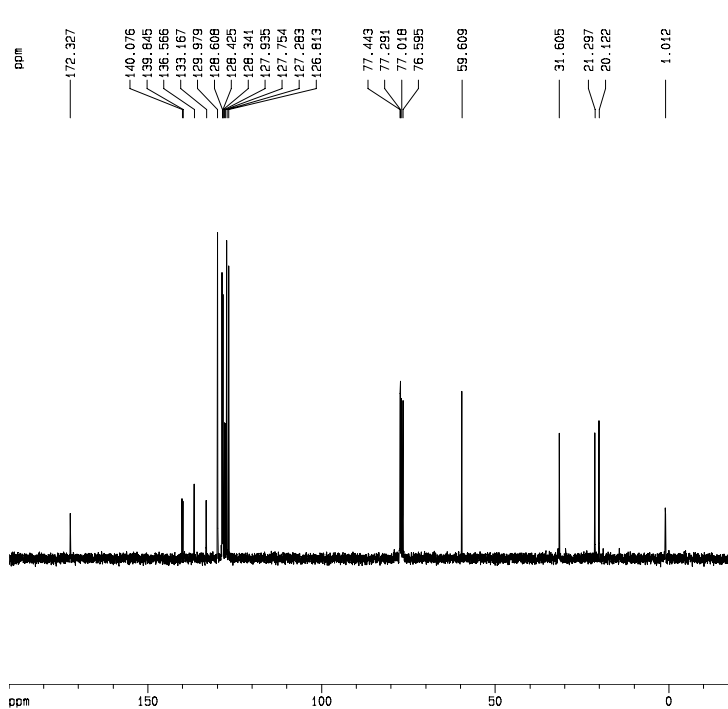

```

Current Data Parameters
NAME          wxn84-3
EXPNO        11
PROCNO       1

F2 - Acquisition Parameters
Date_        20080714
Time         16.46
INSTRUM      spect
PROBHD       5 mm DUL 13C-1
PULPROG      zgpg30
TD           65536
SOLVENT      CDCl3
NS           180
DS           4
SWH          17995.614 Hz
FIDRES       0.274426 Hz
AQ           1.8219508 sec
RG           2899.3
DN           27.800 usec
DC           6.00 usec
TE           303.4 K
D1           2.00000000 sec
D11          0.03000000 sec
DELTA        1.89999998 sec
MCREST       0.00000000 sec
MKRKR        0.01500000 sec

***** CHANNEL f1 *****
NUC1         13C
P1           12.50 usec
PL1          2.00 dB
SFO1         75.4752993 MHz

***** CHANNEL f2 *****
PULPROG2     waltz16
NUC2         1H
P2           80.00 usec
PL2          -1.00 dB
PL12         20.16 dB
PL13         16.38 dB
SFO2         300.1315003 MHz

F2 - Processing parameters
SI           32768
SF           75.4677482 MHz
WDW          EM
SSB          0
LB           1.00 Hz
GB           0
PC           1.40

1D NMR plot parameters
CX           20.00 cm
CY           8.00 cm
F1P          130.000 ppm
F1           14338.87 Hz
F2P          -50.000 ppm
F2           -3773.39 Hz
FREQCM       12.00000 ppm/cm
HZCM         905.81298 Hz/cm
  
```

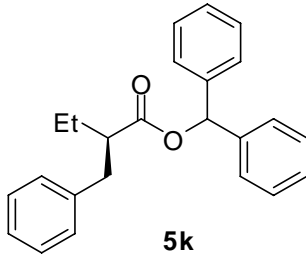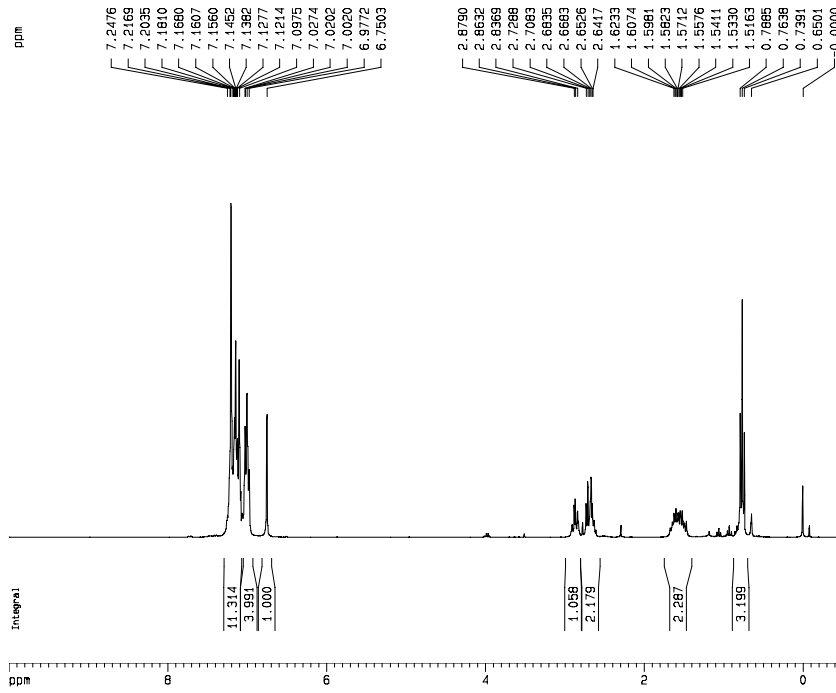

```

Current Data Parameters
NAME          wxn87-1
EXPNO        1
PROCNO       10

F2 - Acquisition Parameters
Date_        20080629
Time         20.51
INSTRUM     spect
PROBHD      5 mm DUL 13C-1
PULPROG     zg30
TD           65536
SOLVENT     CDCl3
VS           16
DS           0
SWH          8992.806 Hz
FIDRES      0.137219 Hz
AQ           3.6438515 sec
RG           71.8
JM           55.600 usec
JE           6.00 usec
TE           673.2 K
D1           1.00000000 sec
dCREST      0.00000000 sec
dCMRRC      0.01500000 sec

===== CHANNEL f1 =====
NUC1         1H
P1           7.00 usec
PL1          -1.00 dB
SFO1        300.1324010 MHz

F2 - Processing parameters
SI           32768
SF           300.1300455 MHz
WDW          EM
SSB          0
LB           0.30 Hz
GB           0
PC           1.00

1D NMR plot parameters
CX           20.00 cm
CY           8.00 cm
FIP          10.000 ppm
F1           3001.30 Hz
F2P          -0.500 ppm
F2           -150.07 Hz
PPMCM       0.52500 ppm/cm
HZCM        157.56827 Hz/cm

```

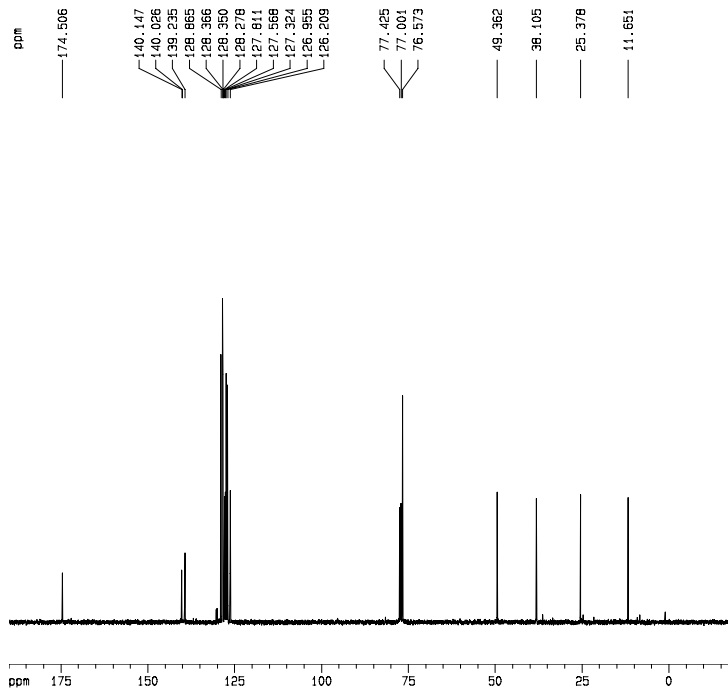

```

Current Data Parameters
NAME          wxn87-1
EXPNO        1
PROCNO       11

F2 - Acquisition Parameters
Date_        20080629
Time         20.59
INSTRUM     spect
PROBHD      5 mm DUL 13C-1
PULPROG     zgpg30
TD           65536
SOLVENT     CDCl3
VS           250
DS           4
SWH          17985.614 Hz
FIDRES      0.274429 Hz
AQ           1.8219508 sec
RG           455.1
JM           27.800 usec
JE           6.00 usec
TE           673.2 K
D1           2.00000000 sec
d11          0.03000000 sec
DELTA       1.89999998 sec
dCREST      0.00000000 sec
dCMRRC      0.01500000 sec

===== CHANNEL f1 =====
NUC1         13C
P1           12.50 usec
PL1          2.00 dB
SFO1        75.4752953 MHz

===== CHANNEL f2 =====
PDPORG2     waltz16
NUC2         1H
P2P2        80.00 usec
PL2         -1.00 dB
PL12        20.16 dB
PL13        16.08 dB
SFO2        300.1315005 MHz

F2 - Processing parameters
SI           32768
SF           75.4677529 MHz
WDW          EM
SSB          0
LB           1.00 Hz
GB           0
PC           1.40

1D NMR plot parameters
CX           20.00 cm
CY           8.00 cm
FIP          130.000 ppm
F1           14338.87 Hz
F2P          -50.000 ppm
F2           -3773.39 Hz
PPMCM       12.00000 ppm/cm
HZCM        905.61310 Hz/cm

```

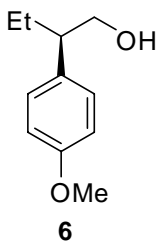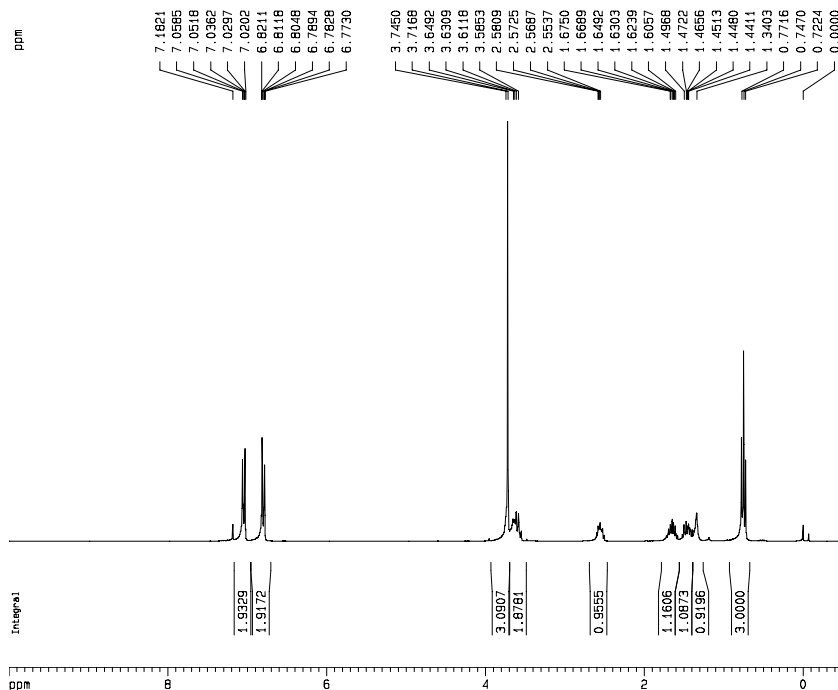

```

Current Data Parameters
NAME      wxNB8-2
EXPNO    10
PROCNO   1

F2 - Acquisition Parameters
Date_    20080528
Time     22.28
INSTRUM  spect
PROBHD   5 mm DUL 13C-1
PULPROG  zgpg30
ID       65836
SOLVENT  CDCl3
VS       16
DS       0
SWH      8592.806 Hz
FIDRES   0.137219 Hz
AQ       3.6438615 sec
RG       90.5
DM       55.600 usec
DE       6.00 usec
TE       293.2 K
SI       1.00000000 sec
MDREST   0.00000000 sec
MDWRK    0.01500000 sec

***** CHANNEL f1 *****
NUC1     1H
P1       7.00 usec
PL1      -1.00 dB
SFO1     300.1324010 MHz

F2 - Processing parameters
SI       32768
SF       300.1300291 MHz
WDW      EM
SSB      0
LB       0.30 Hz
GB       0
PC       1.00

1D NMR plot parameters
CX       20.00 cm
CY       10.00 cm
F1P      10.000 ppm
F1       3001.30 Hz
F2P      -0.500 ppm
F2       -150.07 Hz
PRCM     0.52500 ppm/cm
HZCM     157.56827 Hz/cm
  
```

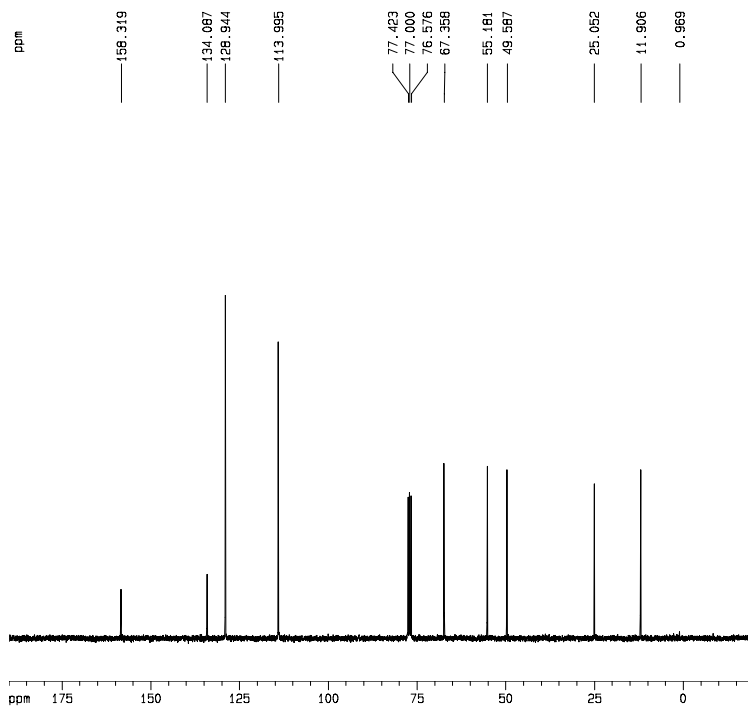

```

Current Data Parameters
NAME      wxNB8-2
EXPNO    11
PROCNO   1

F2 - Acquisition Parameters
Date_    20080528
Time     22.31
INSTRUM  spect
PROBHD   5 mm DUL 13C-1
PULPROG  zgpg30
ID       65836
SOLVENT  CDCl3
VS       318
DS       4
SWH      17985.611 Hz
FIDRES   0.274439 Hz
AQ       1.8019508 sec
RG       488.1
DM       27.800 usec
DE       6.00 usec
TE       293.2 K
SI       2.00000000 sec
MDREST   0.03000000 sec
DELTA    1.89999999 sec
MDREST   0.00000000 sec
MDWRK    0.01500000 sec

***** CHANNEL f1 *****
NUC1     13C
P1       12.50 usec
PL1      2.00 dB
SFO1     75.4752953 MHz

***** CHANNEL f2 *****
PULPROG2 waltz16
NUC2     1H
PCPD2    80.00 usec
PL2      -1.00 dB
PL12     20.15 dB
PL13     16.98 dB
SFO2     300.1312005 MHz

F2 - Processing parameters
SI       32768
SF       75.4677521 MHz
WDW      EM
SSB      0
LB       1.00 Hz
GB       0
PC       1.40

1D NMR plot parameters
CX       20.00 cm
CY       8.00 cm
F1P      190.000 ppm
F1       14336.87 Hz
F2P      -59.000 ppm
F2       -3773.39 Hz
PRCM     12.00000 ppm/cm
HZCM     905.61298 Hz/cm
  
```

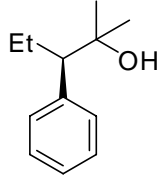

7

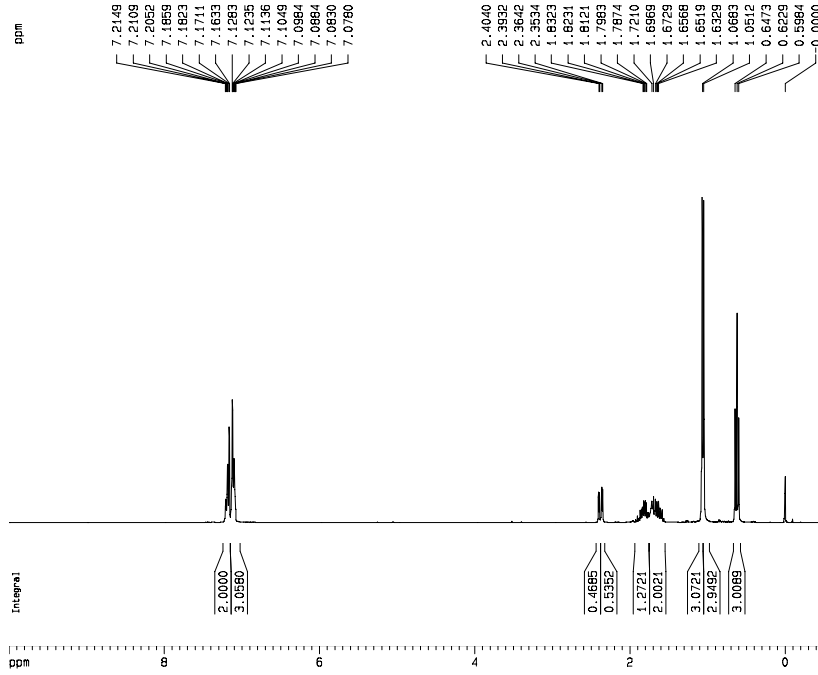

Current Data Parameters  
 NAME wxn109  
 EXPNO 10  
 PROCNO 1

F2 - Acquisition Parameters  
 Date\_ 20080625  
 Time 23.26  
 INSTRUM spect  
 PROBHD 5 mm DL 13C-1  
 PULPROG zg30  
 ID 85836  
 SOLVENT CDCl3  
 NS 16  
 DS 0  
 SWH 8992.806 Hz  
 FIDRES 0.137219 Hz  
 AQ 3.6438818 sec  
 RG 22.6  
 ZW 55.600 usec  
 ZE 6.00 usec  
 TE 298.5 K  
 D1 1.0000000 sec  
 WDCST 0.0000000 sec  
 WDWK 0.0150000 sec

===== CHANNEL f1 =====  
 NUC1 1H  
 P1 7.00 usec  
 PL1 -1.00 dB  
 SFO1 300.1324010 MHz

F2 - Processing parameters  
 SI 32768  
 SF 300.1300408 MHz  
 WDM EM  
 SSB 0  
 LB 0.30 Hz  
 SB 0  
 PC 1.00

1D NMR plot parameters  
 CX 20.00 cm  
 CY 8.00 cm  
 F1P 10.000 ppm  
 F1 3001.30 Hz  
 F2P -0.500 ppm  
 F2 -190.07 Hz  
 FNCM 0.162500 ppm/cm  
 HZCM 157.56827 Hz/cm

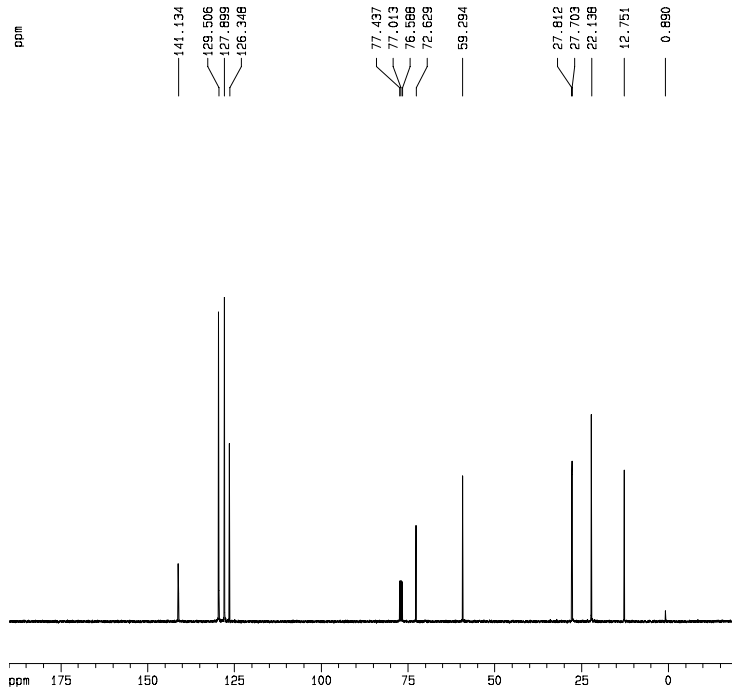

Current Data Parameters  
 NAME wxn109  
 EXPNO 11  
 PROCNO 1

F2 - Acquisition Parameters  
 Date\_ 20080625  
 Time 23.31  
 INSTRUM spect  
 PROBHD 5 mm DL 13C-1  
 PULPROG zgpg30  
 ID 85836  
 SOLVENT CDCl3  
 NS 4  
 DS 4  
 SWH 17986.611 Hz  
 FIDRES 0.274438 Hz  
 AQ 1.8218508 sec  
 RG 512  
 ZW 27.800 usec  
 ZE 6.00 usec  
 TE 300.3 K  
 D1 2.0000000 sec  
 D11 0.0300000 sec  
 DELTA 1.8998998 sec  
 WDCST 0.0000000 sec  
 WDWK 0.0150000 sec

===== CHANNEL f1 =====  
 NUC1 13C  
 P1 12.50 usec  
 PL1 2.00 dB  
 SFO1 75.4752953 MHz

===== CHANNEL f2 =====  
 PULPROG2 waltz16  
 NUC2 1H  
 PPRD2 80.00 usec  
 PL2 -1.00 dB  
 PL12 20.10 dB  
 PL13 15.00 dB  
 SFO2 300.1312005 MHz

F2 - Processing parameters  
 SI 32768  
 SF 75.4677597 MHz  
 WDM EM  
 SSB 0  
 LB 1.00 Hz  
 SB 0  
 PC 1.40

1D NMR plot parameters  
 CX 20.00 cm  
 CY 8.00 cm  
 F1P 190.000 ppm  
 F1 14338.87 Hz  
 F2P -50.000 ppm  
 F2 -3773.38 Hz  
 FNCM 12.00000 ppm/cm  
 HZCM 905.81310 Hz/cm

### Part III Copies of HPLC spectra

Sample Information: AD-H Hex:Ipr=90:10 0.5ml/min

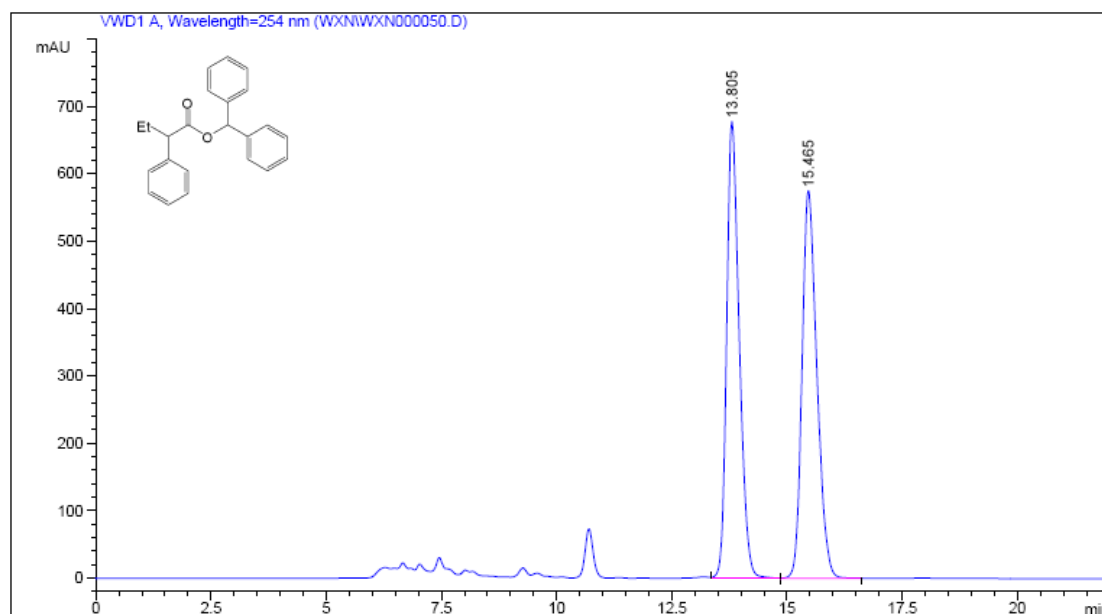

| Peak # | RetTime [min] | Type | Width [min] | Area mAU *s | Height [mAU] | Area %  |
|--------|---------------|------|-------------|-------------|--------------|---------|
| 1      | 13.805        | VV   | 0.2867      | 1.28539e4   | 677.92267    | 49.9968 |
| 2      | 15.465        | VB   | 0.3409      | 1.28555e4   | 575.05573    | 50.0032 |

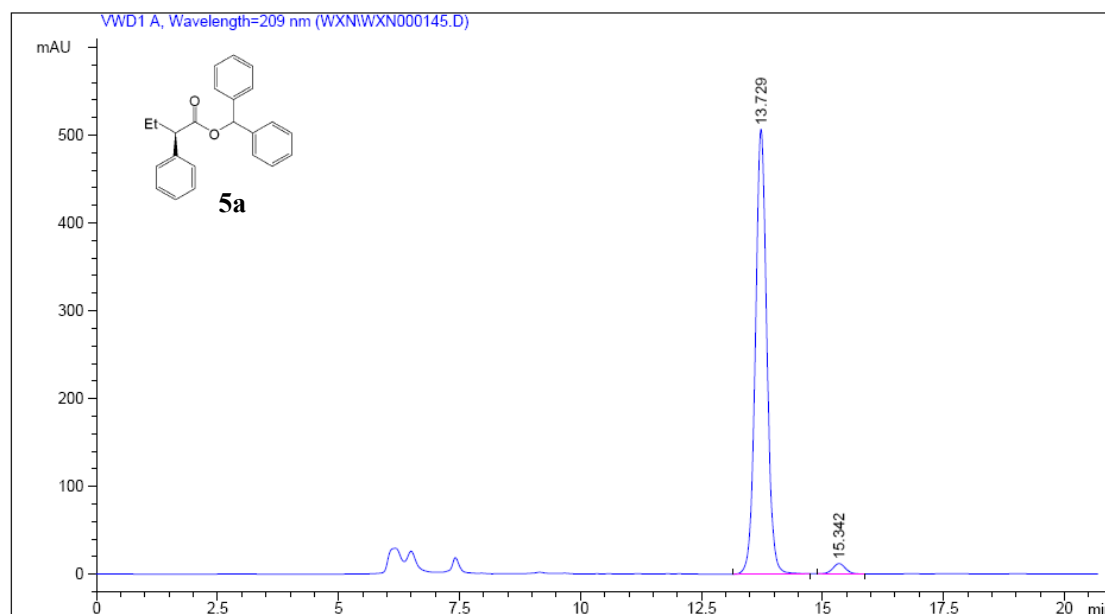

| Peak # | RetTime [min] | Type | Width [min] | Area mAU *s | Height [mAU] | Area %  |
|--------|---------------|------|-------------|-------------|--------------|---------|
| 1      | 13.729        | BB   | 0.2509      | 8303.67969  | 506.62173    | 97.4700 |
| 2      | 15.342        | BB   | 0.2818      | 215.53758   | 11.78757     | 2.5300  |

Sample Information: AD-H Hex:Ipr=99.5:0.5,1.0ml/min

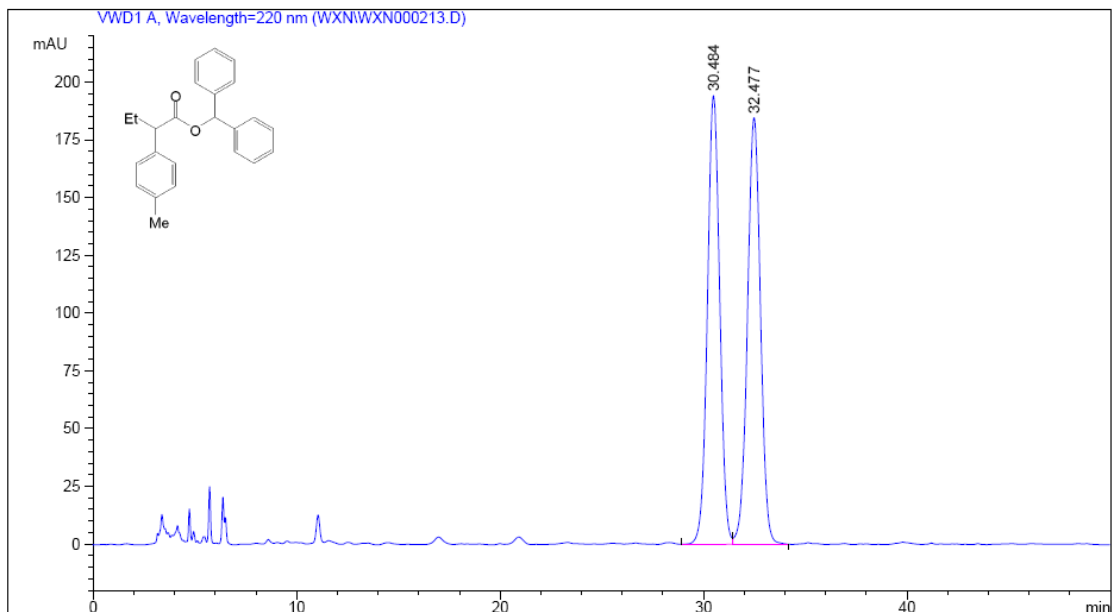

| Peak # | RetTime [min] | Type | Width [min] | Area mAU *s | Height [mAU] | Area %  |
|--------|---------------|------|-------------|-------------|--------------|---------|
| 1      | 30.484        | VV   | 0.6509      | 8167.45459  | 194.18037    | 49.8475 |
| 2      | 32.477        | VB   | 0.6882      | 8217.41211  | 184.59479    | 50.1525 |

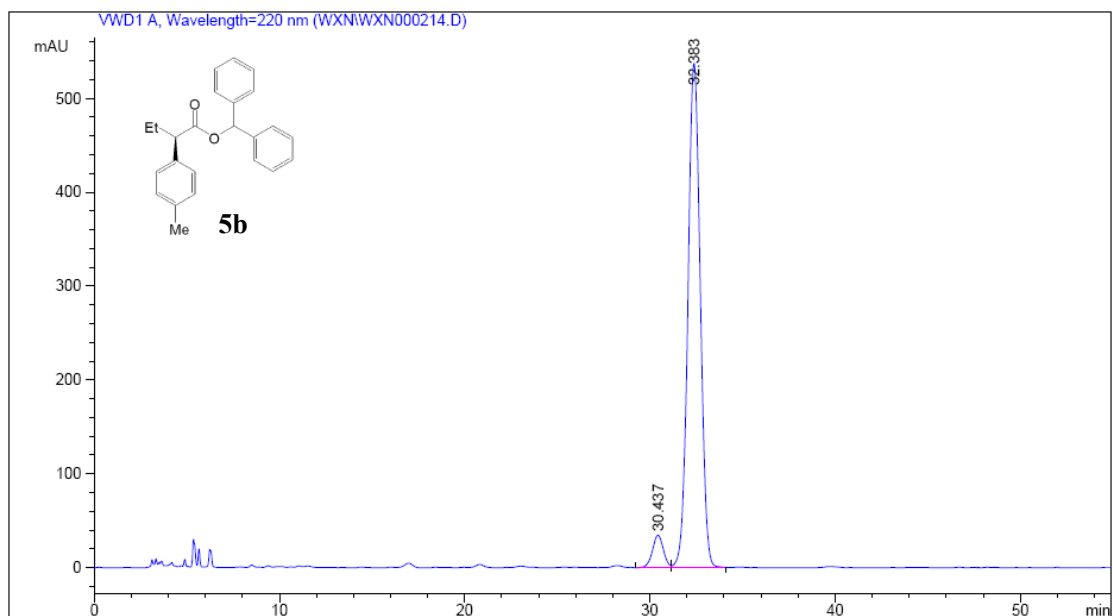

| Peak # | RetTime [min] | Type | Width [min] | Area mAU *s | Height [mAU] | Area %  |
|--------|---------------|------|-------------|-------------|--------------|---------|
| 1      | 30.437        | VV   | 0.6424      | 1419.97632  | 34.45510     | 5.4142  |
| 2      | 32.383        | VB   | 0.7180      | 2.48071e4   | 537.03394    | 94.5858 |



Sample Information : AD-H Hex:Ipr=99:1 1mL/min

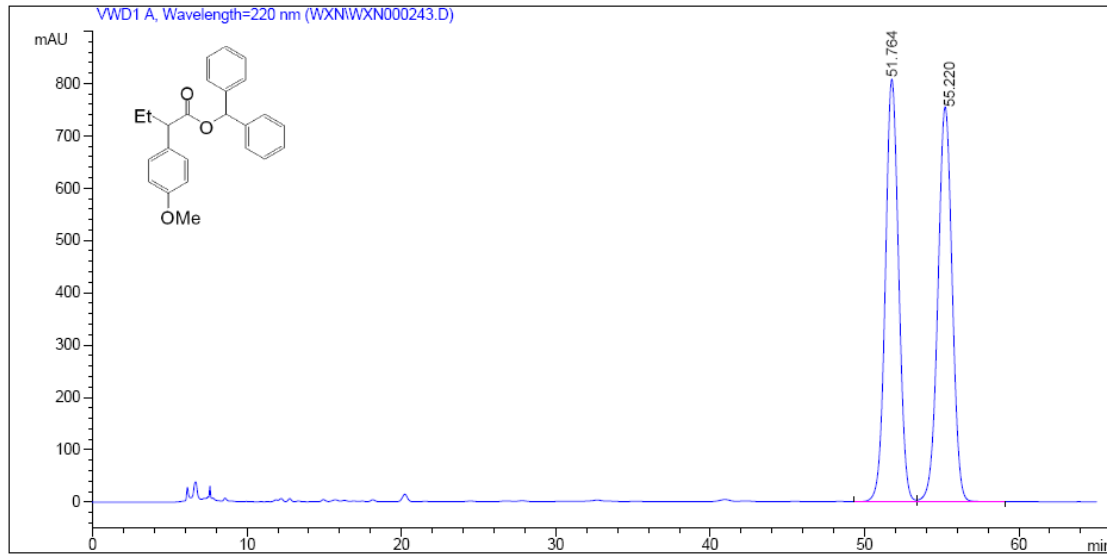

| Peak # | RetTime [min] | Type | Width [min] | Area mAU *s | Height [mAU] | Area %  |
|--------|---------------|------|-------------|-------------|--------------|---------|
| 1      | 51.764        | VV   | 0.9296      | 4.81979e4   | 807.13147    | 49.8362 |
| 2      | 55.220        | VB   | 1.0066      | 4.85148e4   | 754.37280    | 50.1638 |

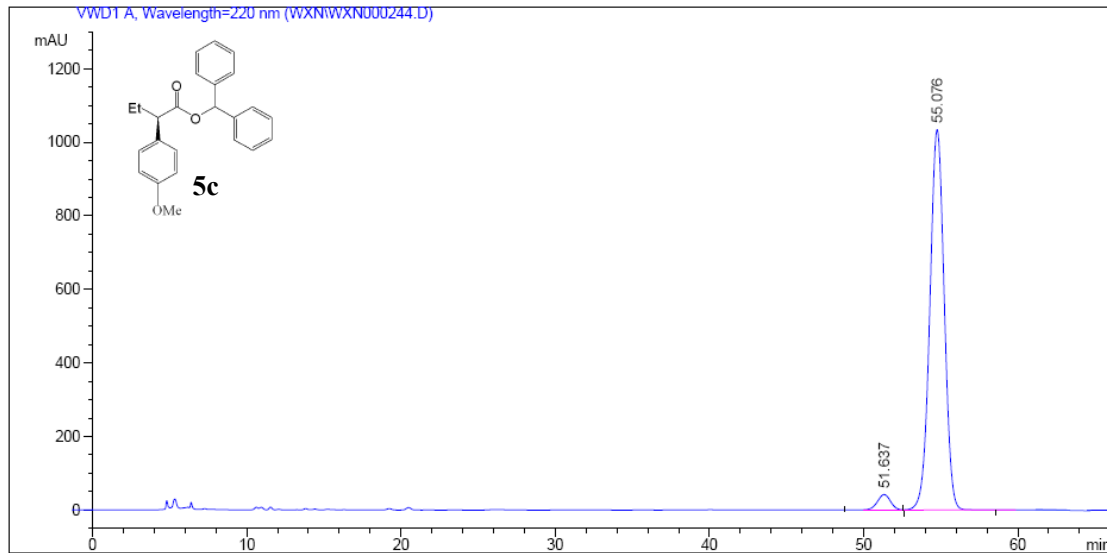

| Peak # | RetTime [min] | Type | Width [min] | Area mAU *s | Height [mAU] | Area %  |
|--------|---------------|------|-------------|-------------|--------------|---------|
| 1      | 51.637        | VV   | 0.9266      | 2526.59692  | 42.14457     | 3.6268  |
| 2      | 55.076        | VB   | 1.0076      | 6.71390e4   | 1034.49780   | 96.3732 |

Sample Information : AD-H Hex:Ipr=95:5 1.0mL/min

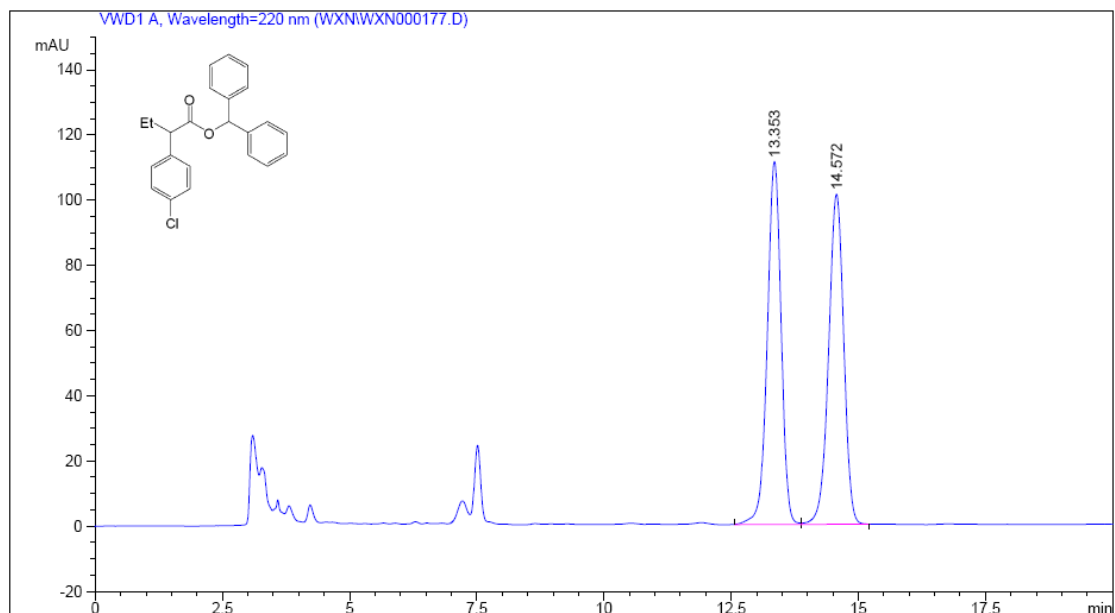

| Peak # | RetTime [min] | Type | Width [min] | Area mAU *s | Height [mAU] | Area %  |
|--------|---------------|------|-------------|-------------|--------------|---------|
| 1      | 13.353        | BV   | 0.2921      | 2107.19995  | 111.34898    | 50.0893 |
| 2      | 14.572        | VB   | 0.3205      | 2099.68530  | 101.27441    | 49.9107 |

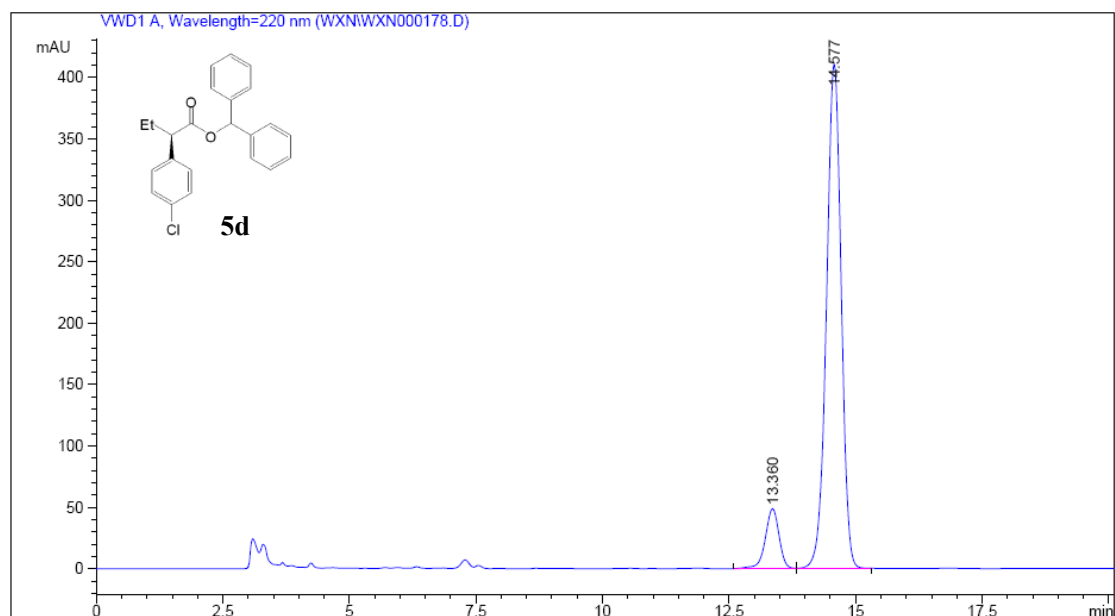

| Peak # | RetTime [min] | Type | Width [min] | Area mAU *s | Height [mAU] | Area %  |
|--------|---------------|------|-------------|-------------|--------------|---------|
| 1      | 13.360        | BV   | 0.2916      | 919.51868   | 48.70133     | 9.9822  |
| 2      | 14.577        | VB   | 0.3128      | 8292.06445  | 410.60495    | 90.0178 |

Sample Information : AD-H, Hex:Ipr=95:5, 1.0mL/min

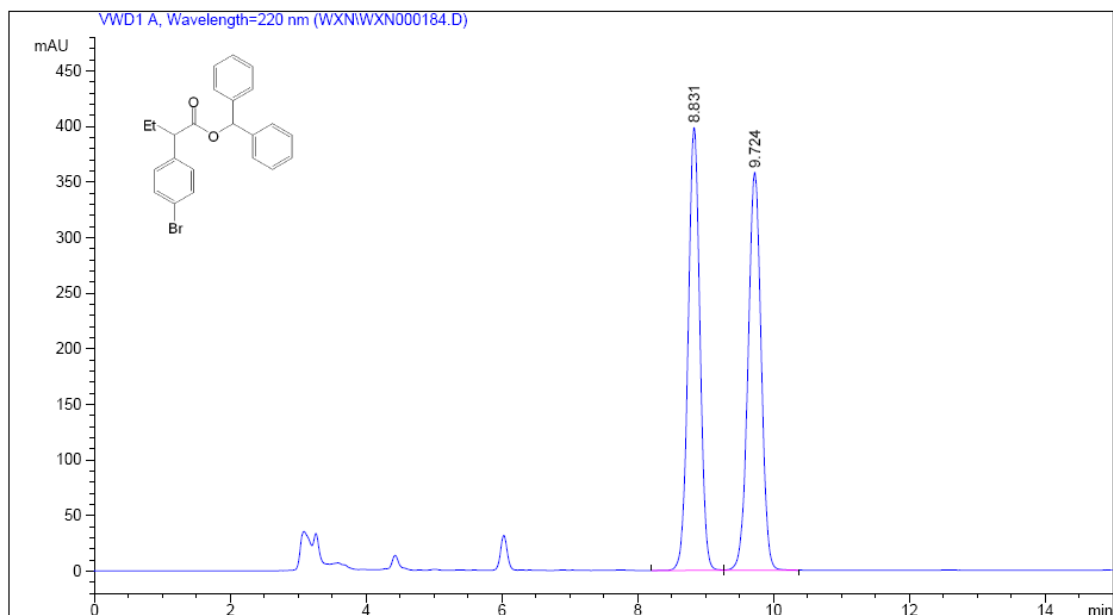

| Peak # | RetTime [min] | Type | Width [min] | Area mAU *s | Height [mAU] | Area %  |
|--------|---------------|------|-------------|-------------|--------------|---------|
| 1      | 8.831         | VV   | 0.1871      | 4799.52881  | 398.59085    | 49.9389 |
| 2      | 9.724         | VB   | 0.2092      | 4811.26709  | 358.07864    | 50.0611 |

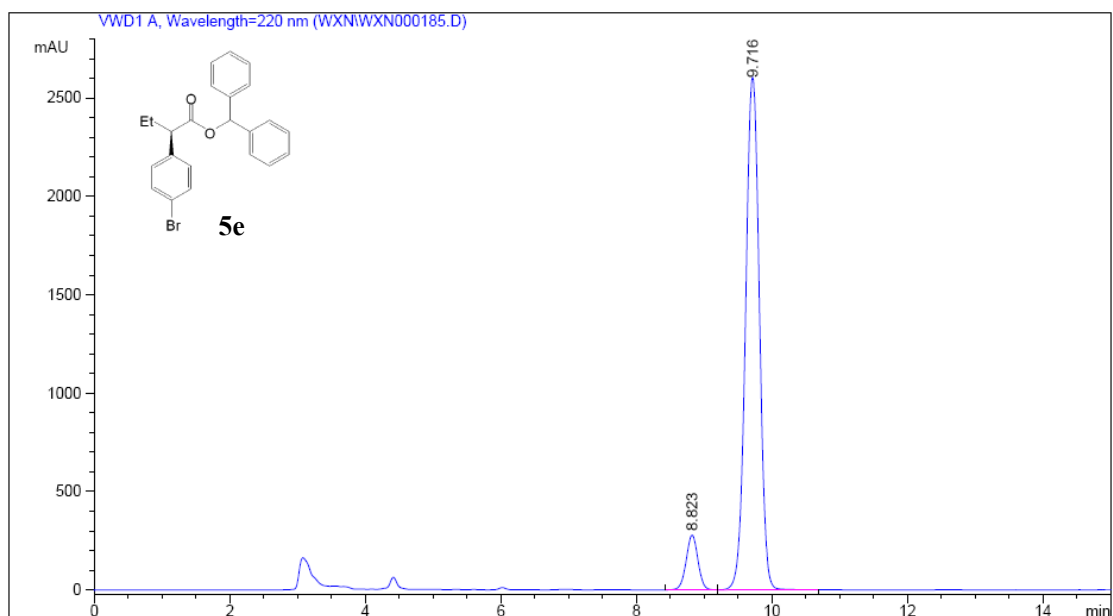

| Peak # | RetTime [min] | Type | Width [min] | Area mAU *s | Height [mAU] | Area %  |
|--------|---------------|------|-------------|-------------|--------------|---------|
| 1      | 8.823         | BV   | 0.1858      | 3357.23071  | 278.35046    | 8.3653  |
| 2      | 9.716         | VB   | 0.2215      | 3.67755e4   | 2604.95117   | 91.6347 |

Sample Information : AD-H Hex:Ipr=90:10, 0.5mL/min

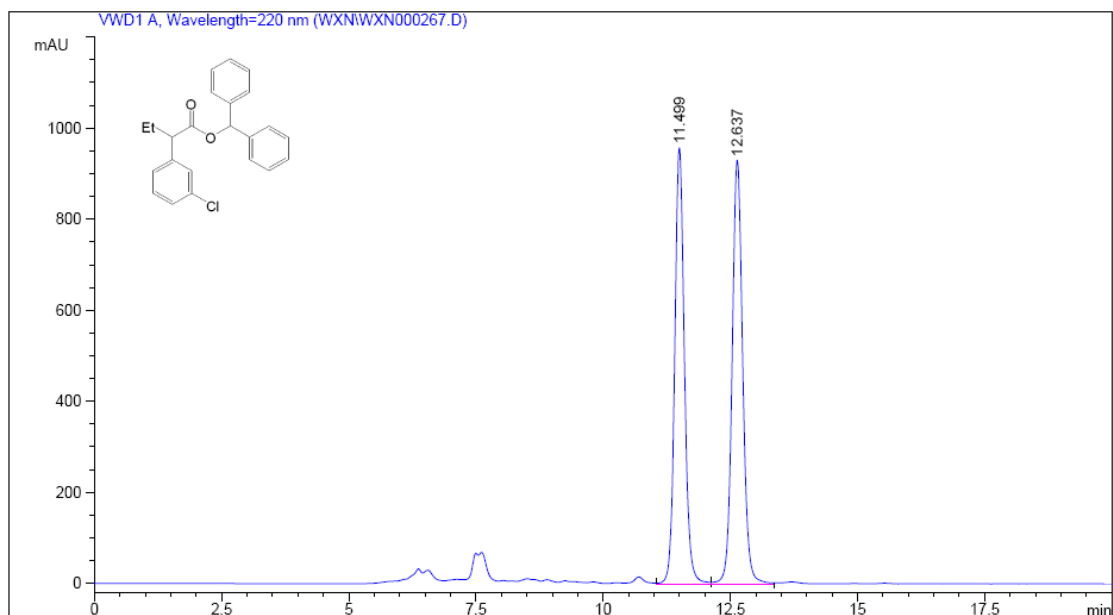

| Peak # | RetTime [min] | Type | Width [min] | Area mAU *s | Height [mAU] | Area %  |
|--------|---------------|------|-------------|-------------|--------------|---------|
| 1      | 11.499        | VV   | 0.2018      | 1.26280e4   | 957.99084    | 48.4341 |
| 2      | 12.637        | VV   | 0.2224      | 1.34446e4   | 930.62634    | 51.5659 |

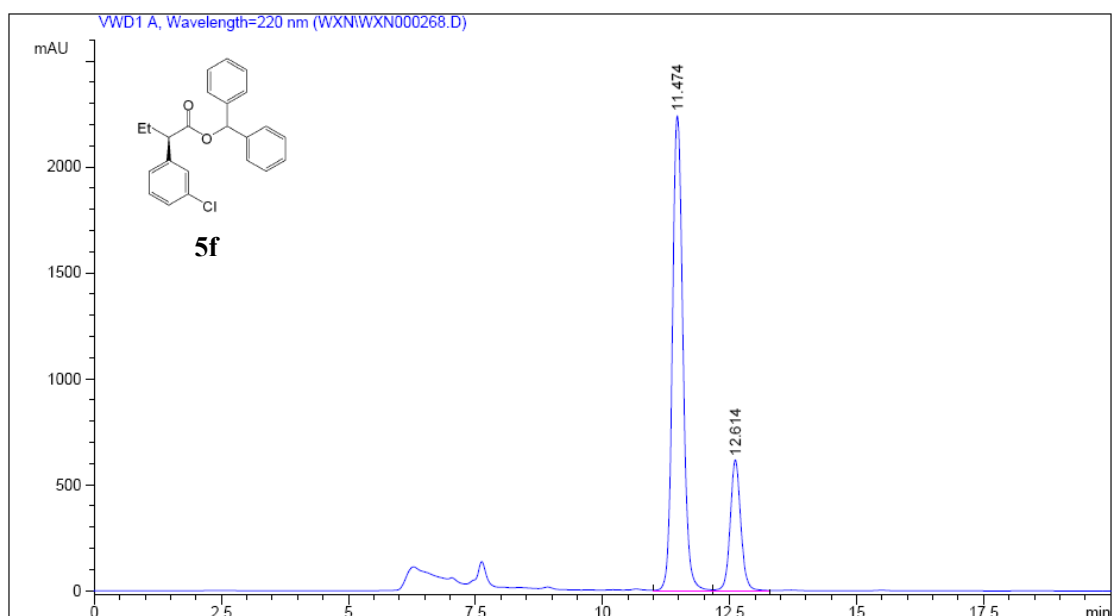

| Peak # | RetTime [min] | Type | Width [min] | Area mAU *s | Height [mAU] | Area %  |
|--------|---------------|------|-------------|-------------|--------------|---------|
| 1      | 11.474        | VV   | 0.2233      | 3.22782e4   | 2242.08472   | 78.2415 |
| 2      | 12.614        | VV   | 0.2235      | 8976.37695  | 617.40021    | 21.7585 |

Sample Information : AD-H Hex:Ipr=95:5,1.0ml/min

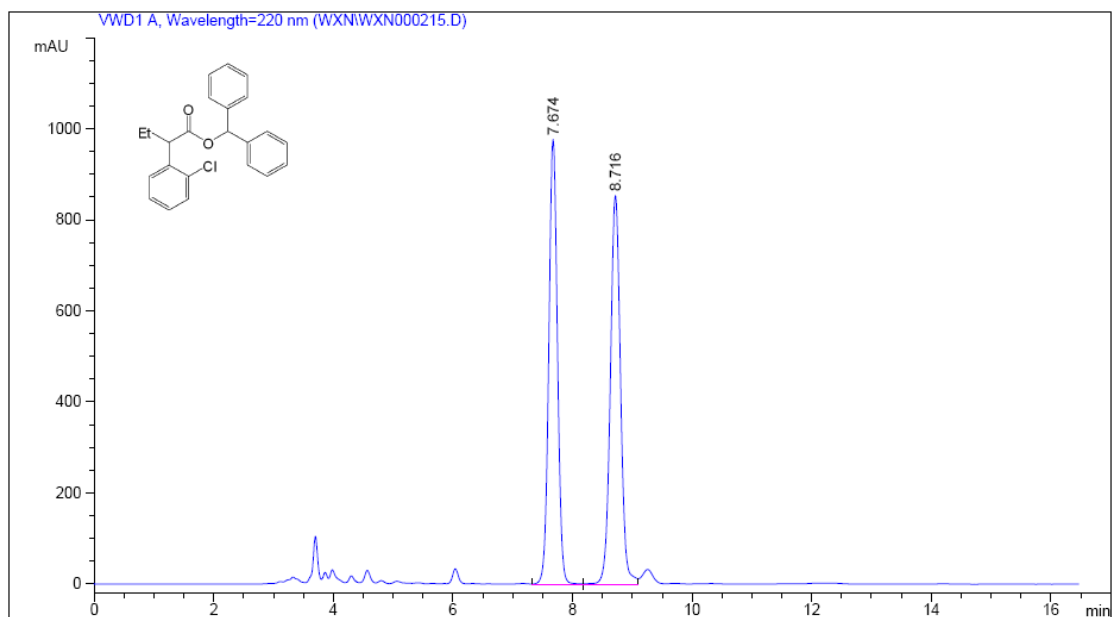

| Peak # | RetTime [min] | Type | Width [min] | Area mAU *s | Height [mAU] | Area %  |
|--------|---------------|------|-------------|-------------|--------------|---------|
| 1      | 7.674         | VV   | 0.1562      | 9786.94629  | 976.90363    | 49.3089 |
| 2      | 8.716         | VV   | 0.1827      | 1.00613e4   | 853.38440    | 50.6911 |

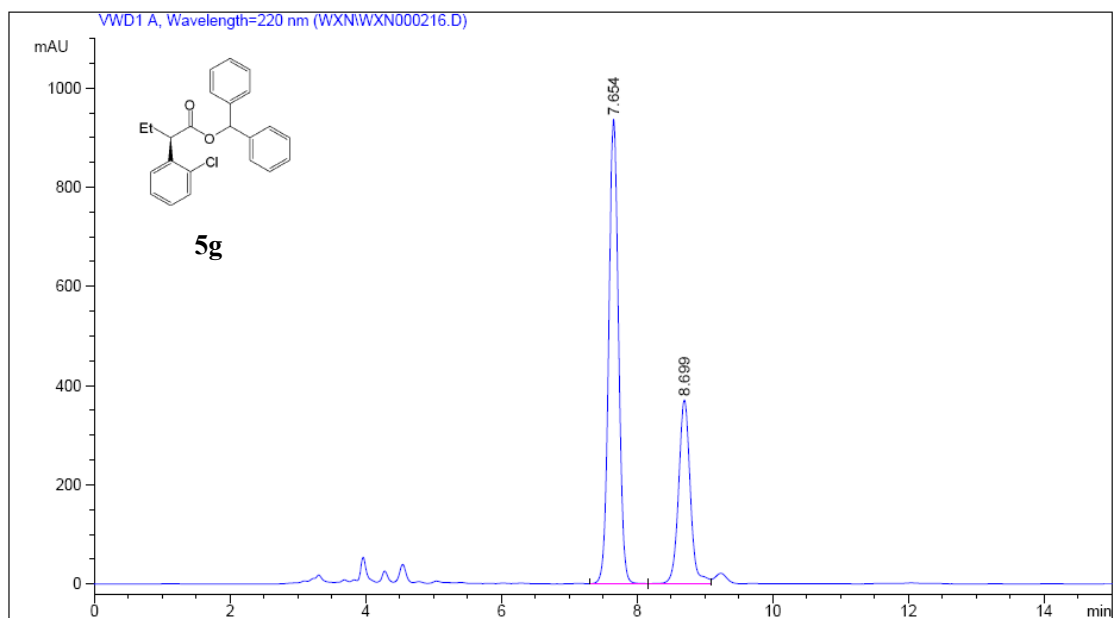

| Peak # | RetTime [min] | Type | Width [min] | Area mAU *s | Height [mAU] | Area %  |
|--------|---------------|------|-------------|-------------|--------------|---------|
| 1      | 7.654         | VV   | 0.1566      | 9419.89063  | 936.89575    | 67.9113 |
| 2      | 8.699         | VV   | 0.1836      | 4450.97559  | 371.02631    | 32.0887 |

Sample Information : AD-H Hex:Ipr=95:5 1mL/min

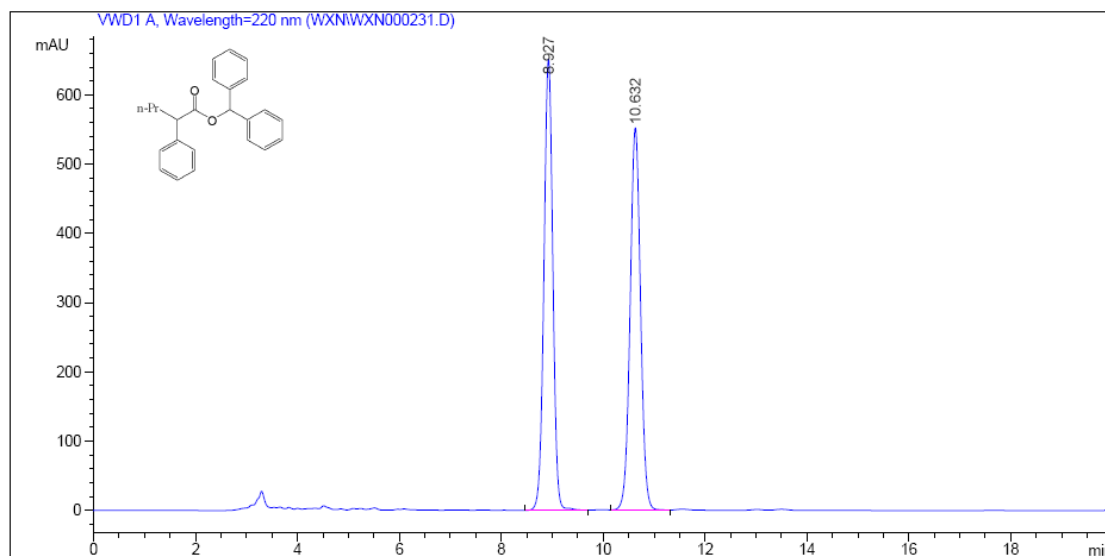

| Peak # | RetTime [min] | Type | Width [min] | Area mAU *s | Height [mAU] | Area %  |
|--------|---------------|------|-------------|-------------|--------------|---------|
| 1      | 8.927         | VV   | 0.1883      | 7908.24414  | 651.26709    | 50.0827 |
| 2      | 10.632        | VV   | 0.2218      | 7882.13672  | 552.29883    | 49.9173 |

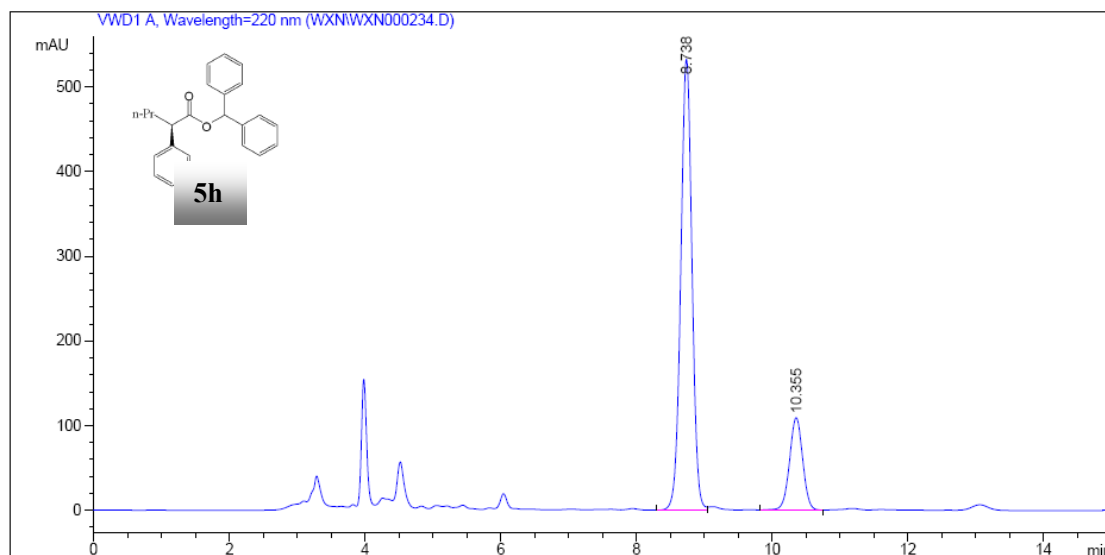

| Peak # | RetTime [min] | Type | Width [min] | Area mAU *s | Height [mAU] | Area %  |
|--------|---------------|------|-------------|-------------|--------------|---------|
| 1      | 8.738         | VV   | 0.1779      | 6130.53320  | 532.82599    | 80.4082 |
| 2      | 10.355        | VV   | 0.2114      | 1493.73279  | 109.58608    | 19.5918 |

Sample Information : AD-H, Hex:Ipr=95:5, 1ml/min

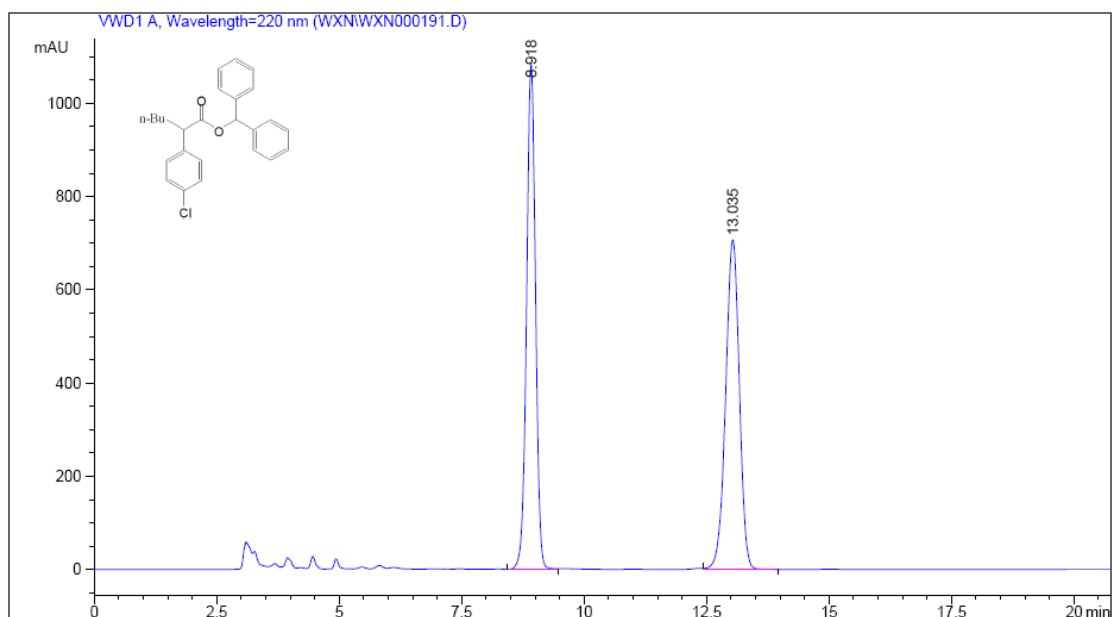

| Peak # | RetTime [min] | Type | Width [min] | Area mAU *s | Height [mAU] | Area %  |
|--------|---------------|------|-------------|-------------|--------------|---------|
| 1      | 8.918         | VV   | 0.1964      | 1.37846e4   | 1083.73401   | 50.0686 |
| 2      | 13.035        | VB   | 0.3026      | 1.37468e4   | 706.96381    | 49.9314 |

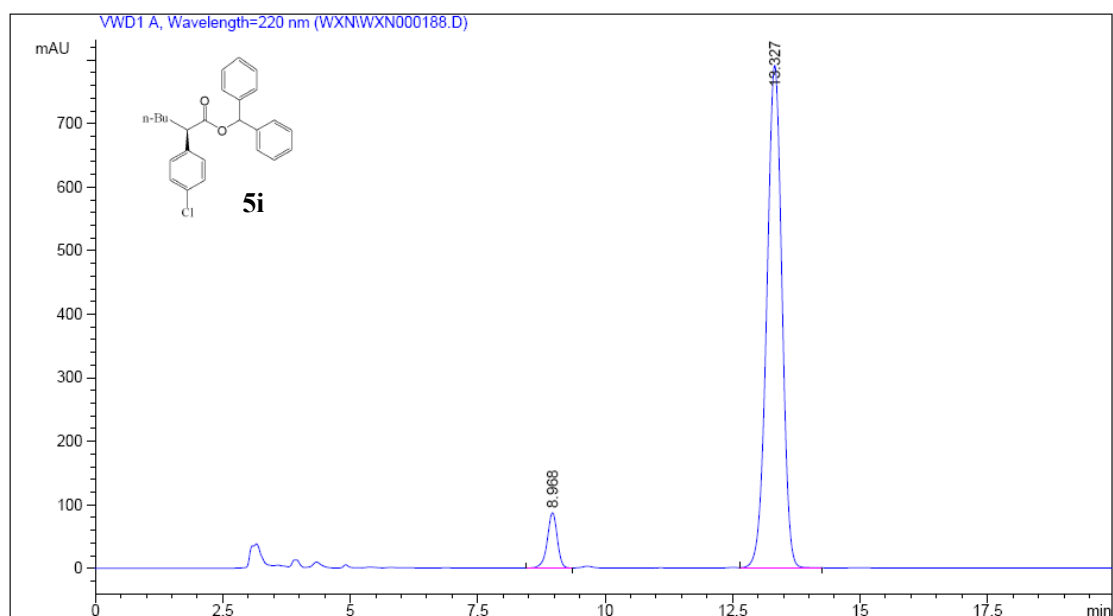

| Peak # | RetTime [min] | Type | Width [min] | Area mAU *s | Height [mAU] | Area %  |
|--------|---------------|------|-------------|-------------|--------------|---------|
| 1      | 8.968         | VV   | 0.2094      | 1188.17761  | 87.50921     | 6.7755  |
| 2      | 13.327        | VB   | 0.3212      | 1.63483e4   | 790.92108    | 93.2245 |

Sample Information : AD-H Hex:Ipr=95:5 ,1ml/min

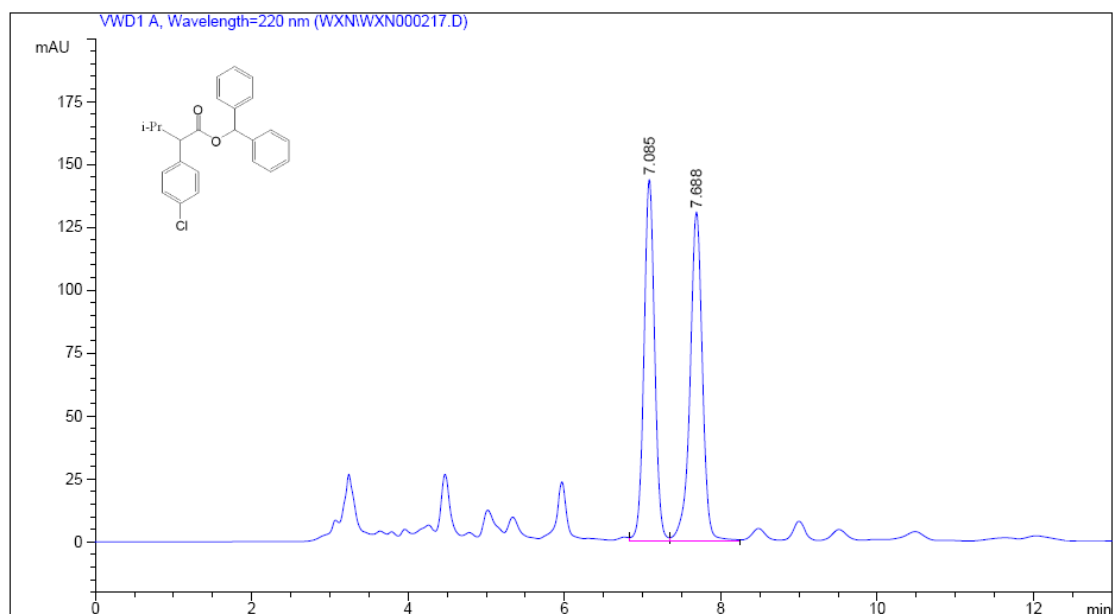

| Peak # | RetTime [min] | Type | Width [min] | Area mAU *s | Height [mAU] | Area %  |
|--------|---------------|------|-------------|-------------|--------------|---------|
| 1      | 7.085         | VV   | 0.1471      | 1364.36475  | 143.83299    | 48.5089 |
| 2      | 7.688         | VV   | 0.1669      | 1448.24023  | 130.94727    | 51.4911 |

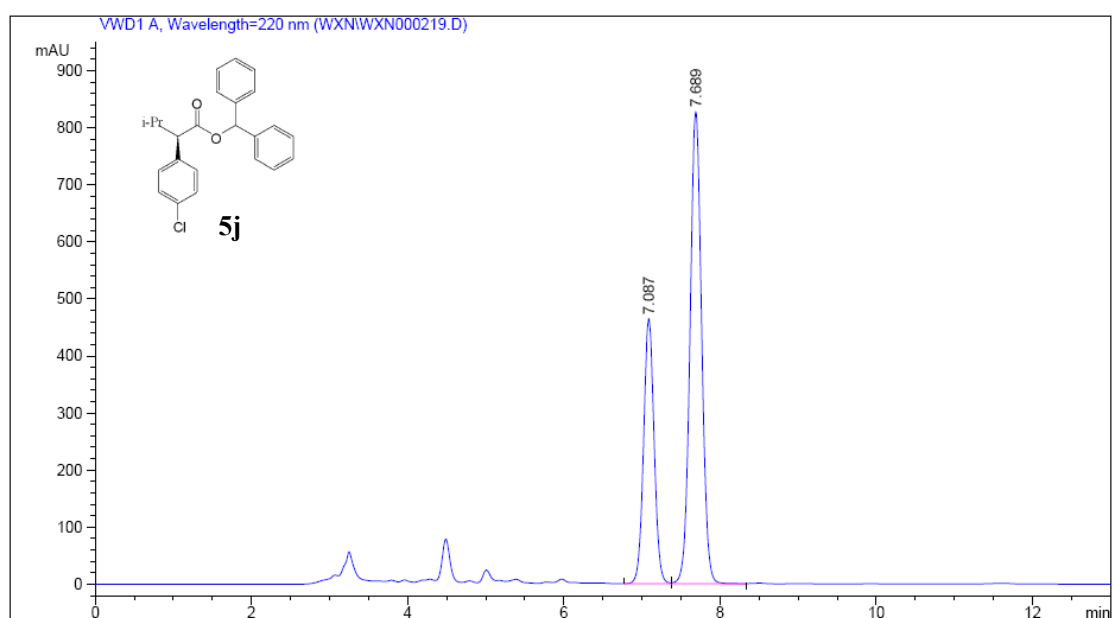

| Peak # | RetTime [min] | Type | Width [min] | Area mAU *s | Height [mAU] | Area %  |
|--------|---------------|------|-------------|-------------|--------------|---------|
| 1      | 7.087         | VV   | 0.1441      | 4348.72900  | 464.83844    | 33.7182 |
| 2      | 7.689         | VB   | 0.1598      | 8548.53223  | 827.70355    | 66.2818 |



Sample Information : AD-H Hex:Ipr=90:10 0.5mL/min

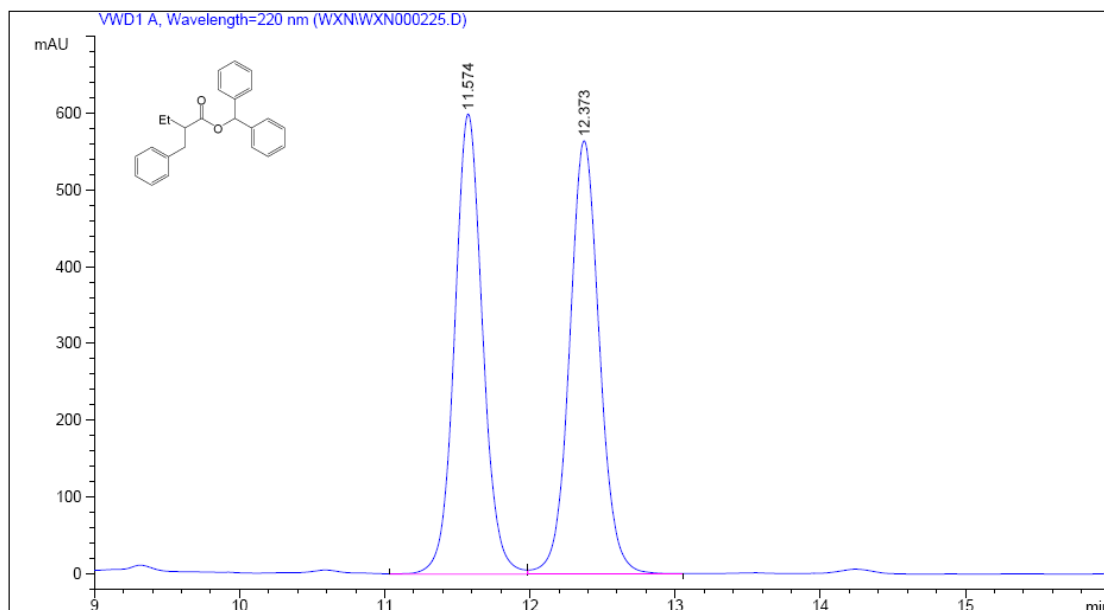

| Peak # | RetTime [min] | Type | Width [min] | Area mAU *s | Height [mAU] | Area %  |
|--------|---------------|------|-------------|-------------|--------------|---------|
| 1      | 11.574        | VV   | 0.2062      | 8052.43311  | 599.69244    | 49.8551 |
| 2      | 12.373        | VB   | 0.2197      | 8099.25049  | 564.84424    | 50.1449 |

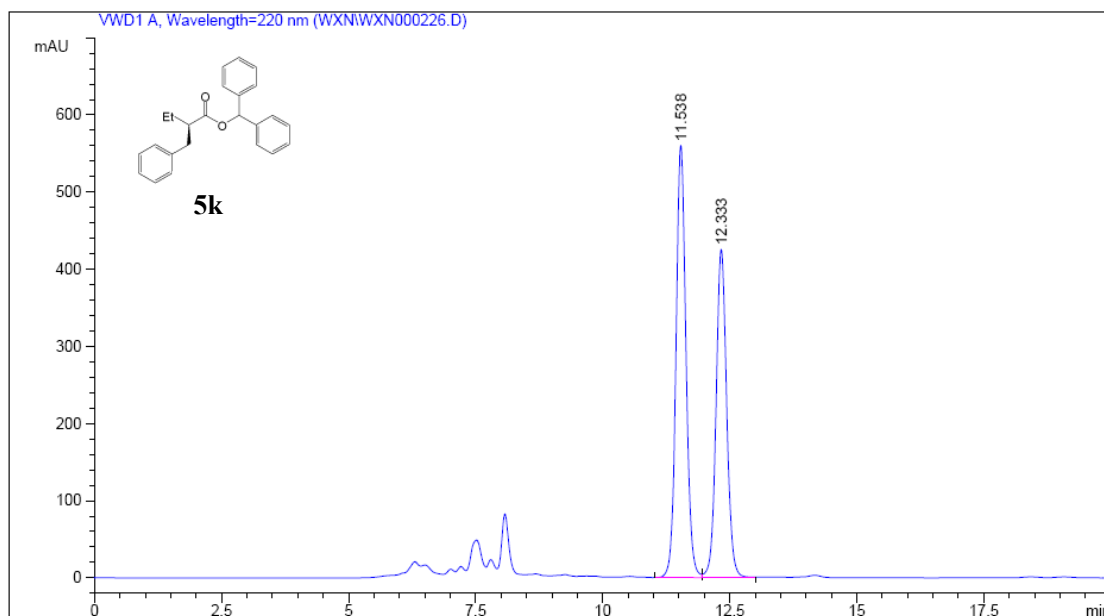

| Peak # | RetTime [min] | Type | Width [min] | Area mAU *s | Height [mAU] | Area %  |
|--------|---------------|------|-------------|-------------|--------------|---------|
| 1      | 11.538        | BV   | 0.2080      | 7611.61182  | 560.29803    | 55.3198 |
| 2      | 12.333        | VB   | 0.2224      | 6147.67480  | 425.45969    | 44.6802 |

Sample Information : OD-H Hex:Ipr=99:1 1mL/min

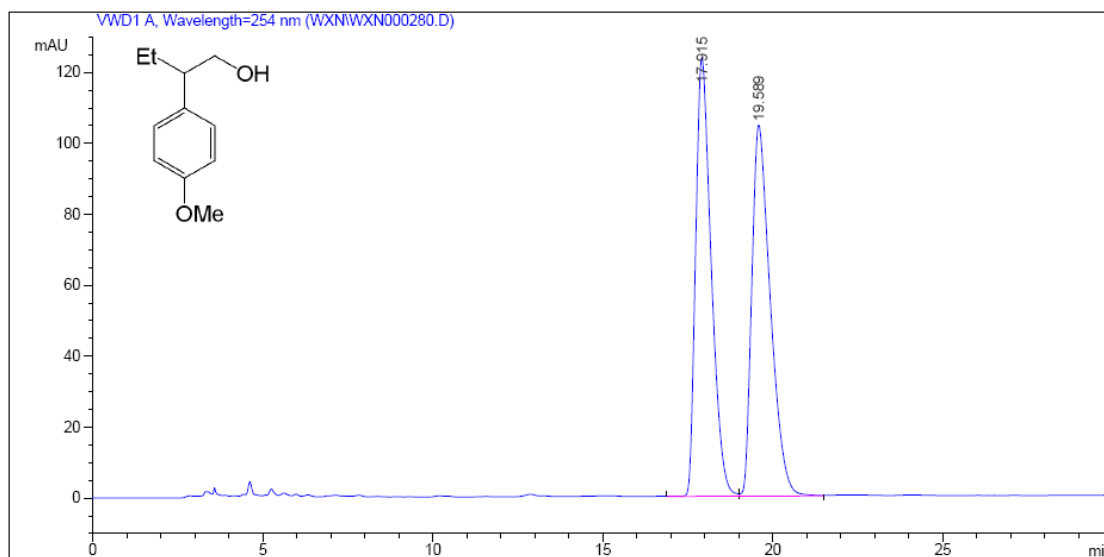

| Peak # | RetTime [min] | Type | Width [min] | Area mAU *s | Height [mAU] | Area %  |
|--------|---------------|------|-------------|-------------|--------------|---------|
| 1      | 17.915        | BV   | 0.4897      | 3926.88916  | 123.71674    | 49.7819 |
| 2      | 19.589        | VB   | 0.5814      | 3961.30005  | 104.65126    | 50.2181 |

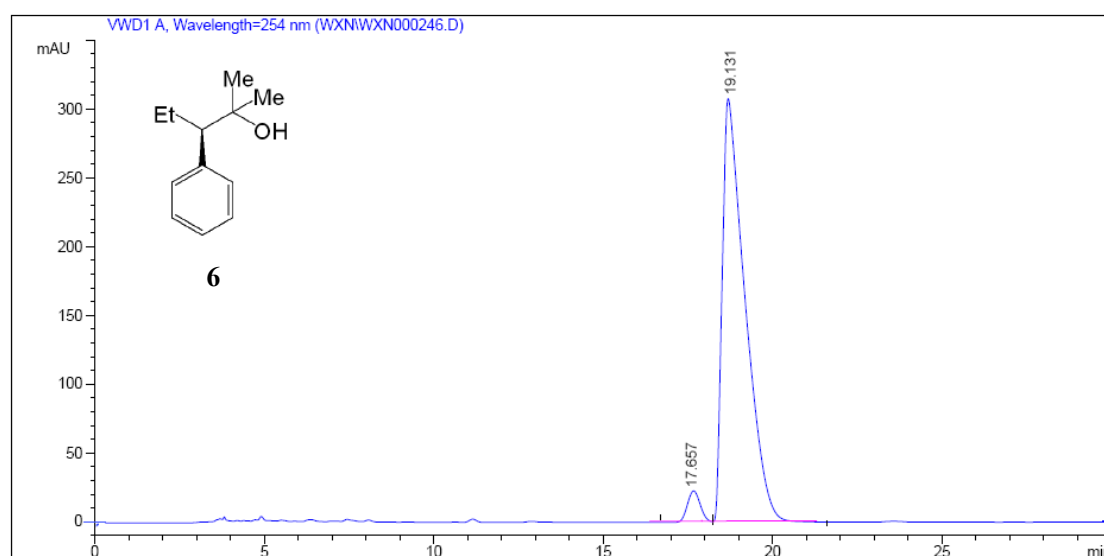

| Peak # | RetTime [min] | Type | Width [min] | Area mAU *s | Height [mAU] | Area %  |
|--------|---------------|------|-------------|-------------|--------------|---------|
| 1      | 17.657        | VV   | 0.4203      | 605.43195   | 22.81477     | 4.0348  |
| 2      | 19.131        | VB   | 0.6620      | 1.43999e4   | 307.96243    | 95.9652 |

Sample Information : AD-H Hex:Ipr=99:1 1mL/min

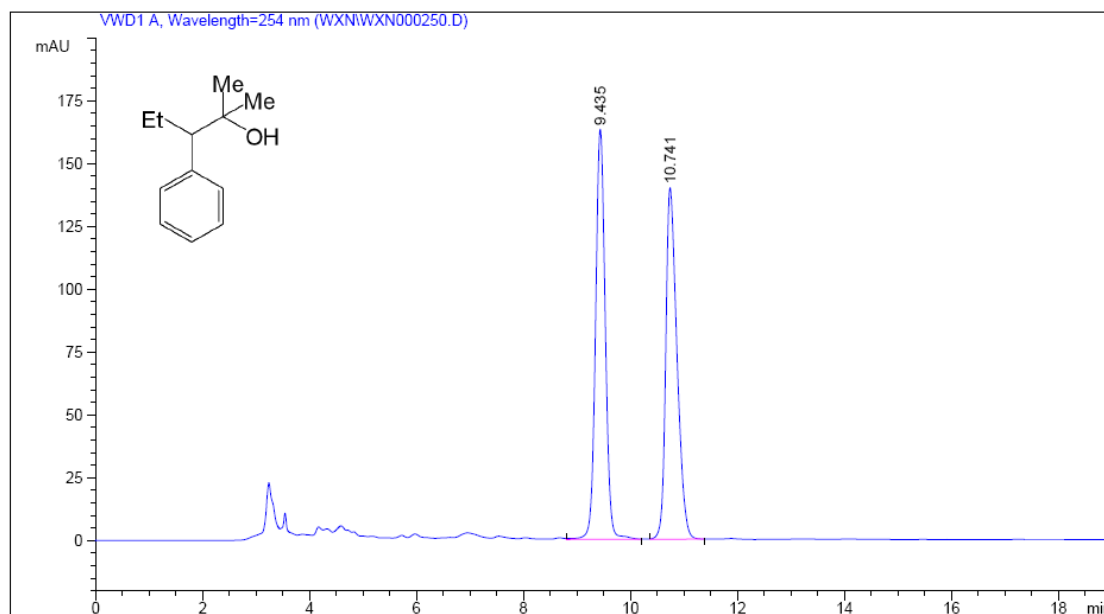

| Peak # | RetTime [min] | Type | Width [min] | Area mAU *s | Height [mAU] | Area %  |
|--------|---------------|------|-------------|-------------|--------------|---------|
| 1      | 9.435         | VB   | 0.1952      | 2058.22656  | 163.17094    | 50.3700 |
| 2      | 10.741        | BB   | 0.2202      | 2027.98865  | 139.82823    | 49.6300 |

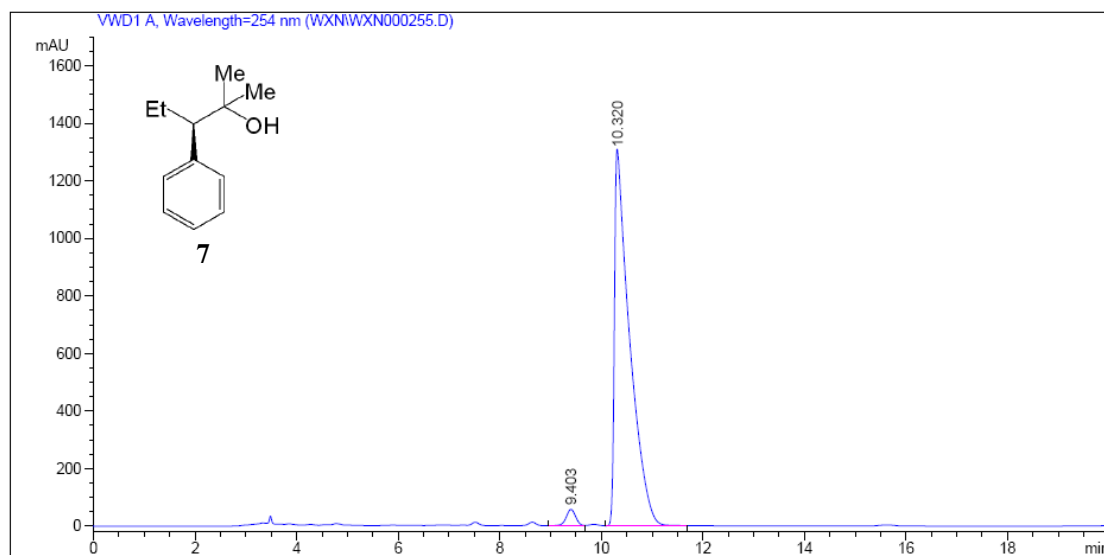

| Peak # | RetTime [min] | Type | Width [min] | Area mAU *s | Height [mAU] | Area %  |
|--------|---------------|------|-------------|-------------|--------------|---------|
| 1      | 9.403         | VV   | 0.2097      | 776.27460   | 57.57655     | 2.7817  |
| 2      | 10.320        | VV   | 0.2805      | 2.71298e4   | 1304.20923   | 97.2183 |
